# Supplementary material for: Epidemic waves of COVID-19 in Scotland: a genomic perspective on the impact of the introduction and relaxation of lockdown on SARS-CoV-2
Source: bioRxiv or medRxiv preprint supplement (doi:10.1101/2021.01.08.20248677), 2021-01-20
Supplement: Supplementary file [file media-1.pdf]

## Supplementary Material

Interactive versions of plots with data to 2020-08-18 (first wave) can be found at R-shiny RiseFallScotCOVID app: <http://sars2.cvr.gla.ac.uk/RiseFallScotCOVID/>

Interactive versions of plots with 2020-10-21 data (second wave) can be found at R-shiny RiseFallScotCOVID app: <http://phylogenetics.lycett.roslin.ed.ac.uk:3838/RiseFallScotCOVID/>

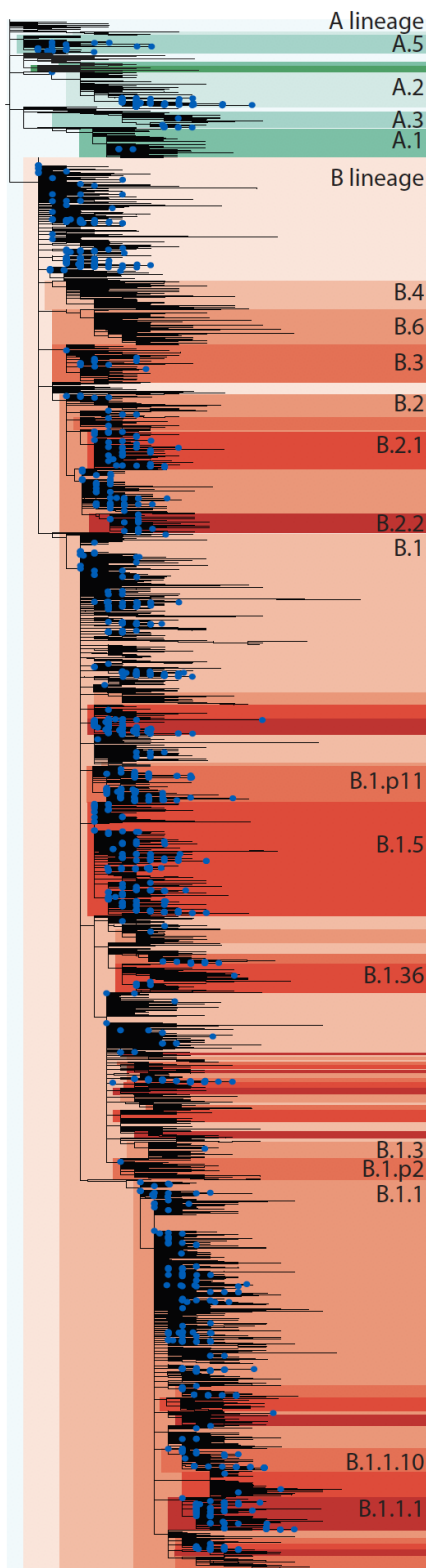

**Supplementary figure 1.** Phylogenetic trees showing the SARS-CoV-2 diversity circulating in Scotland August 18th 2020 comparison to the global lineages defined by (Rambaut et al. 2020). Scottish variants are denoted with blue circles.

A

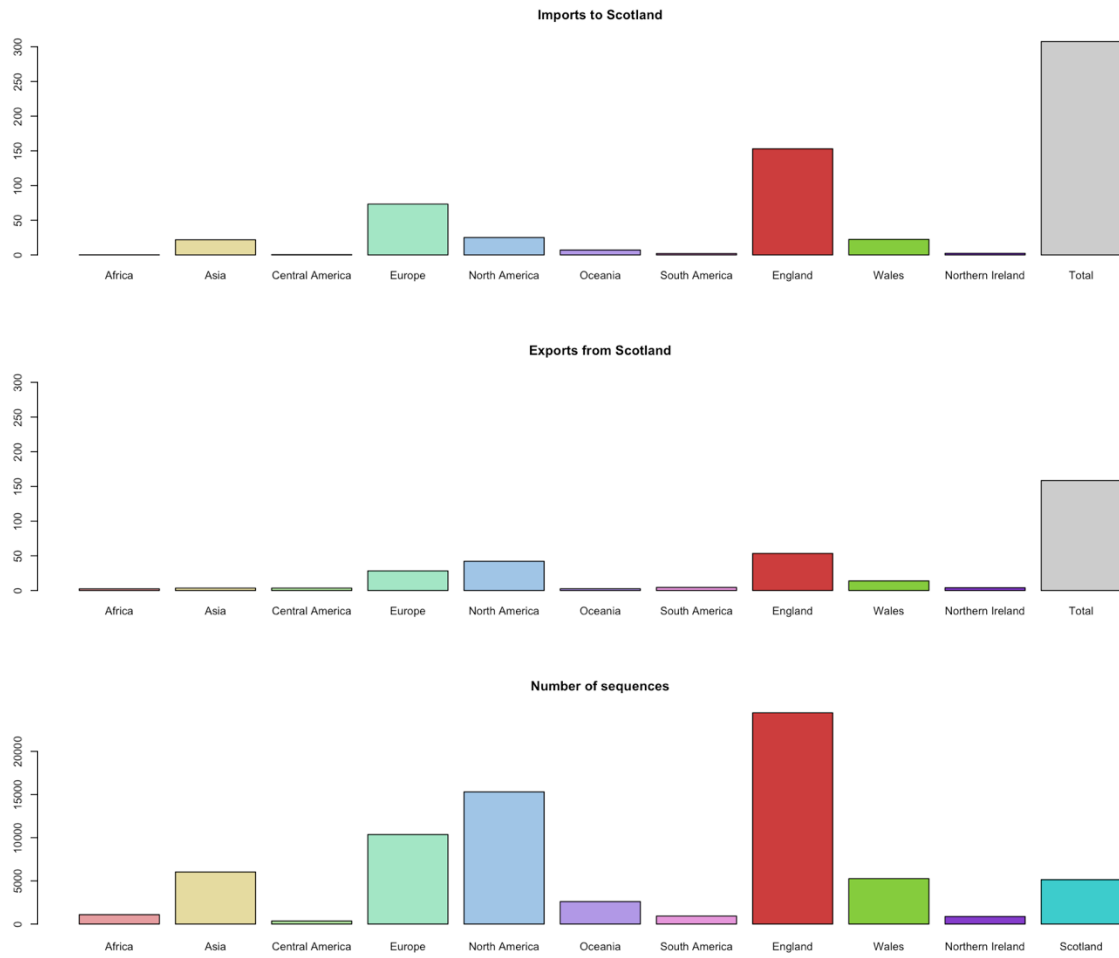

B

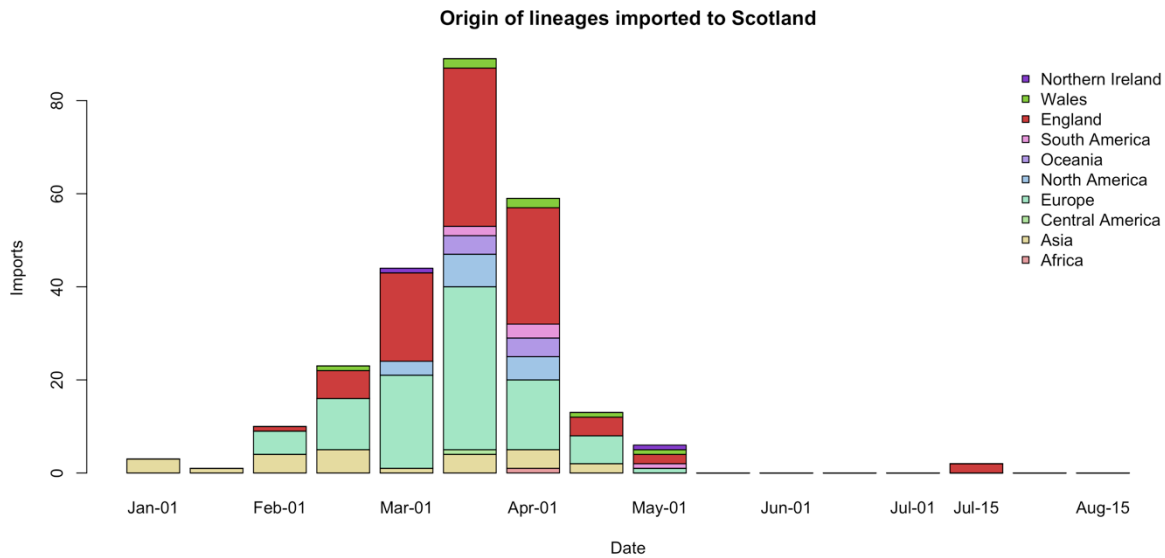

**Supplementary figure 2.** Estimate of the number of imports and exports of SARS-CoV-2 cases into Scotland using data collected up to 18th August 2020. A| by geographical region and B| lineage imports by time.

## A - Ayrshire and Arran

Ayrshire and Arran

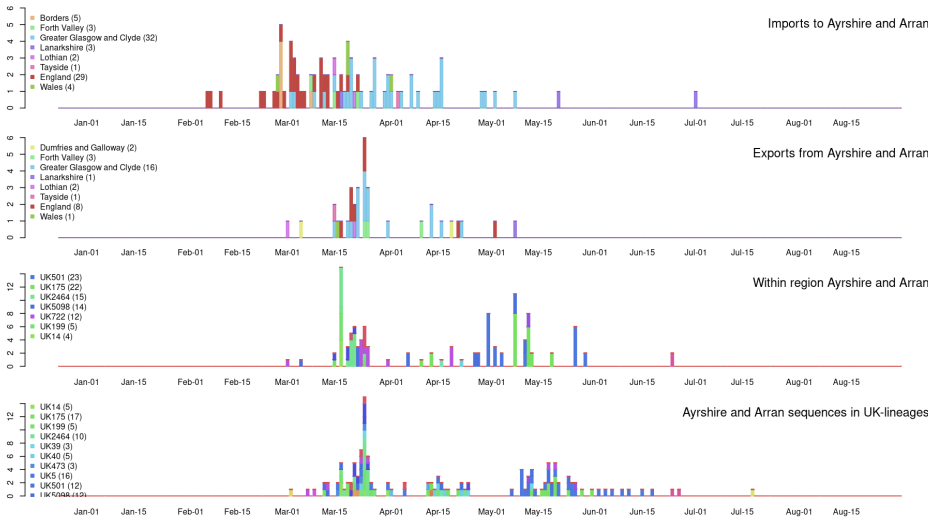

Summary for Health Board

|         | Pre   | Mid    | Post |
|---------|-------|--------|------|
| Imports | 53.00 | 26.00  | 0.00 |
| Exports | 15.00 | 19.00  | 0.00 |
| Within  | 41.00 | 87.00  | 0.00 |
| Samples | 27.00 | 104.00 | 0.00 |

## B - Borders

Borders

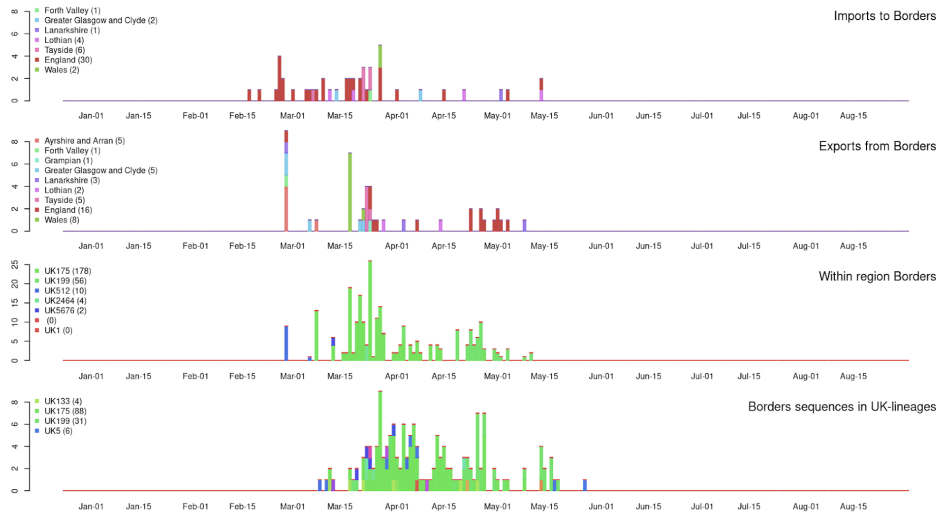

Summary for Health Board

|         | Pre   | Mid    | Post |
|---------|-------|--------|------|
| Imports | 30.00 | 16.00  | 0.00 |
| Exports | 25.00 | 21.00  | 0.00 |
| Within  | 95.00 | 155.00 | 0.00 |
| Samples | 13.00 | 139.00 | 0.00 |

## C - Dumfries and Galloway

Dumfries and Galloway

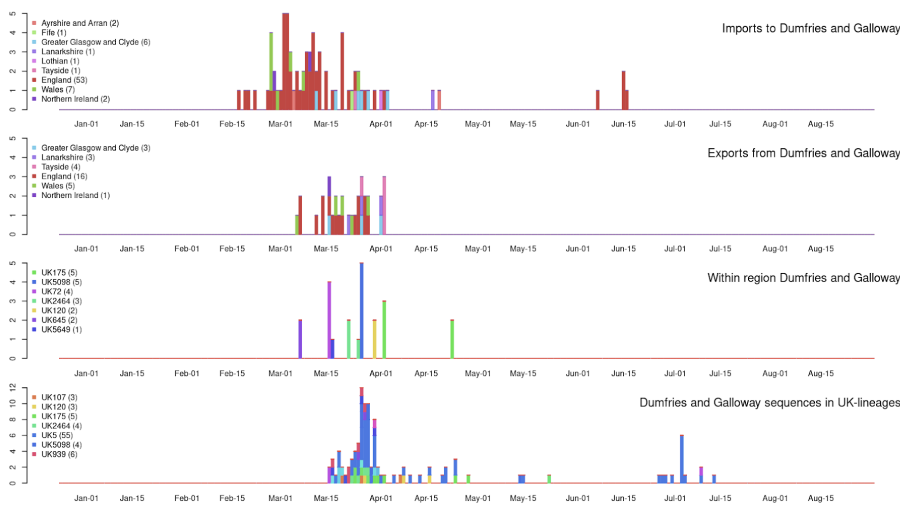

Summary for Health Board

|         | Pre   | Mid   | Post |
|---------|-------|-------|------|
| Imports | 56.00 | 18.00 | 0.00 |
| Exports | 16.00 | 16.00 | 0.00 |
| Within  | 44.00 | 40.00 | 0.00 |
| Samples | 15.00 | 90.00 | 0.00 |

## D - Fife

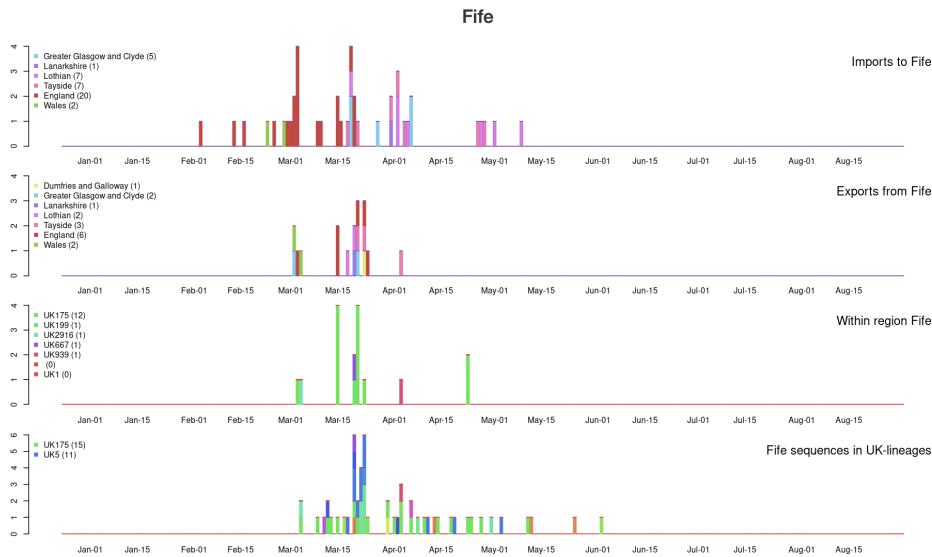

### Summary for Health Board

|         | Pre   | Mid   | Post |
|---------|-------|-------|------|
| Imports | 27.00 | 15.00 | 0.00 |
| Exports | 14.00 | 3.00  | 0.00 |
| Within  | 30.00 | 5.00  | 0.00 |
| Samples | 22.00 | 32.00 | 0.00 |

## E - Forth Valley

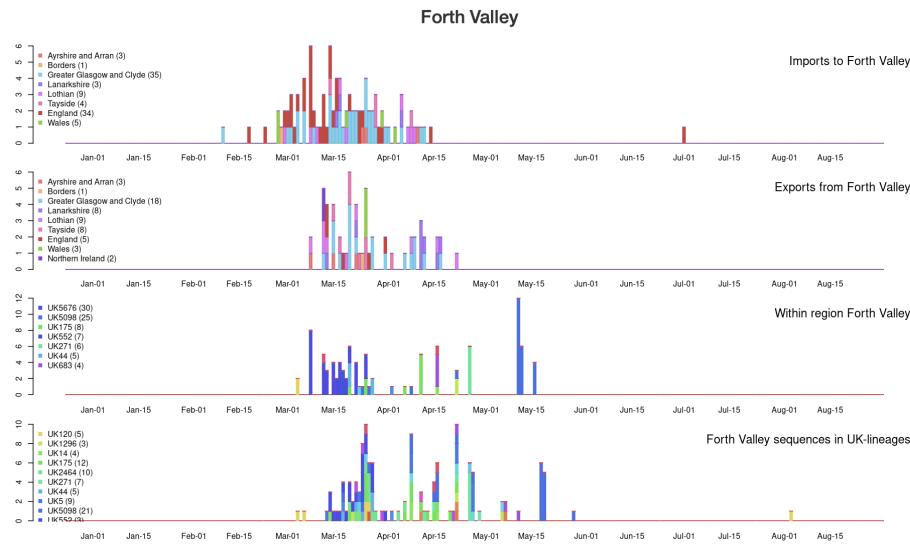

### Summary for Health Board

|         | Pre   | Mid    | Post |
|---------|-------|--------|------|
| Imports | 62.00 | 32.00  | 0.00 |
| Exports | 30.00 | 27.00  | 0.00 |
| Within  | 48.00 | 65.00  | 0.00 |
| Samples | 24.00 | 105.00 | 1.00 |

## F - Grampian

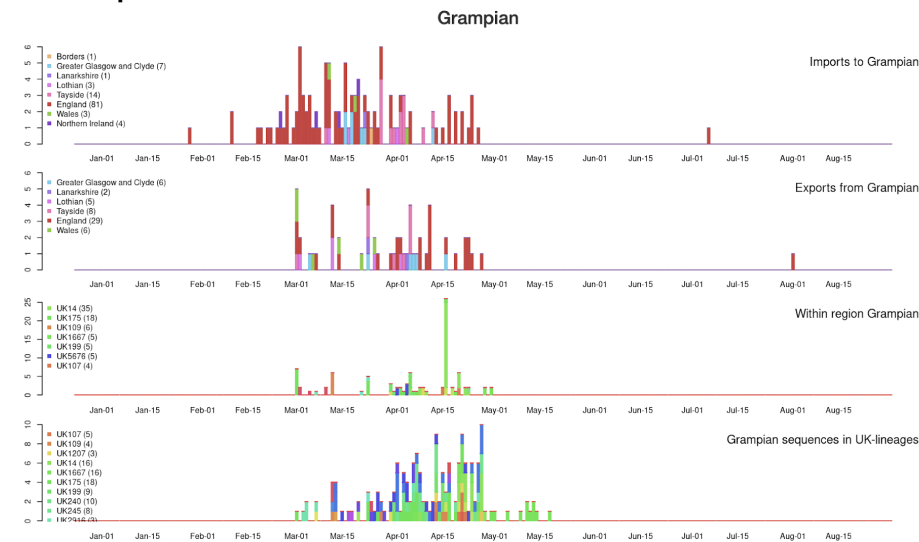

### Summary for Health Board

|         | Pre   | Mid    | Post  |
|---------|-------|--------|-------|
| Imports | 72.00 | 42.00  | 0.00  |
| Exports | 20.00 | 35.00  | 1.00  |
| Within  | 30.00 | 101.00 | 91.00 |
| Samples | 19.00 | 145.00 | 0.00  |

## G - Greater Glasgow and Clyde

Greater Glasgow and Clyde

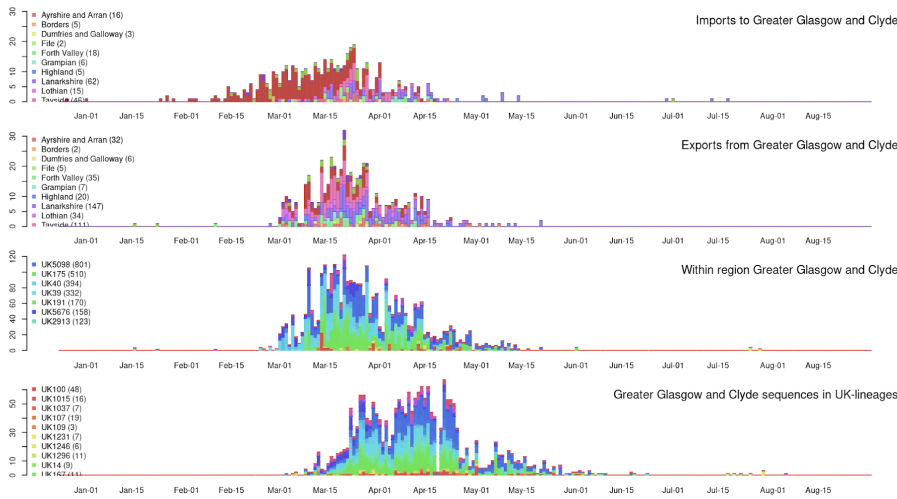

Summary for Health Board

|         | Pre     | Mid     | Post |
|---------|---------|---------|------|
| Imports | 339.00  | 167.00  | 0.00 |
| Exports | 287.00  | 250.00  | 0.00 |
| Within  | 1468.00 | 1854.00 | 6.00 |
| Samples | 143.00  | 1821.00 | 7.00 |

## H - Highland

Highland

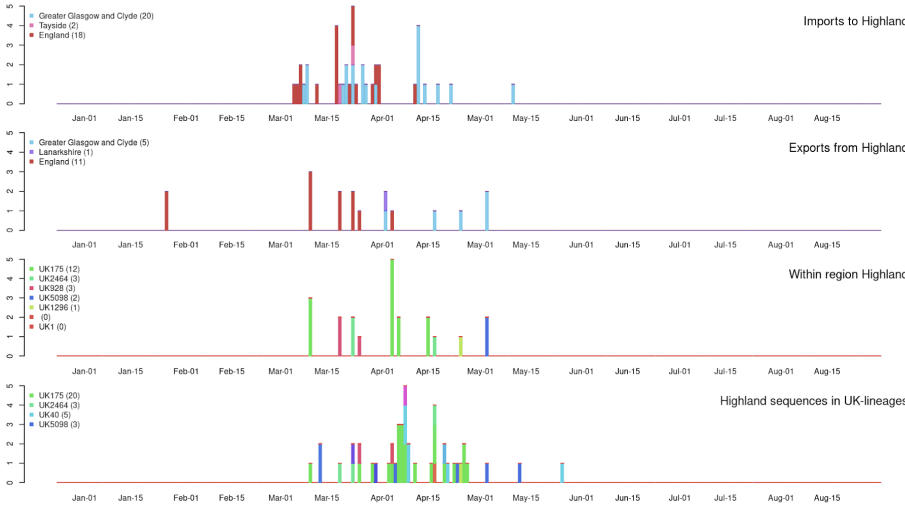

Summary for Health Board

|         | Pre   | Mid   | Post |
|---------|-------|-------|------|
| Imports | 20.00 | 20.00 | 0.00 |
| Exports | 7.00  | 10.00 | 0.00 |
| Within  | 7.00  | 14.00 | 0.00 |
| Samples | 4.00  | 41.00 | 0.00 |

## I - Lanarkshire

Lanarkshire

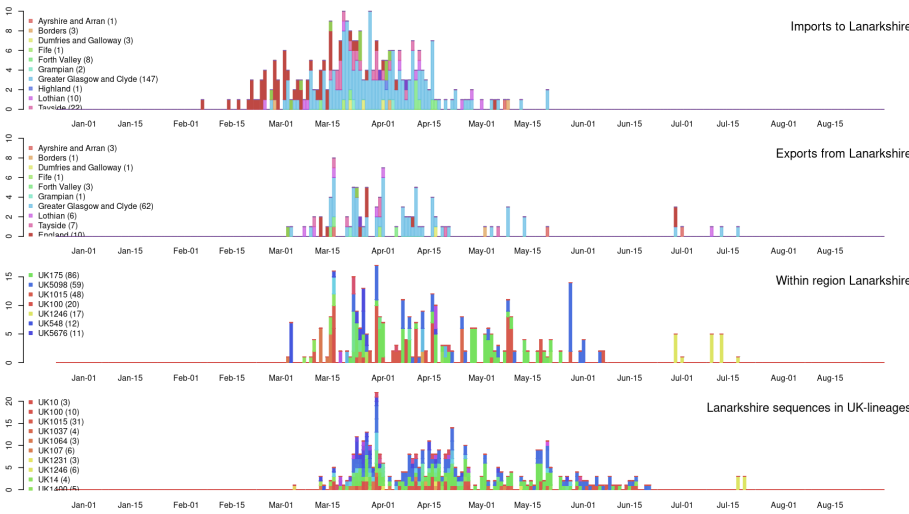

Summary for Health Board

|         | Pre    | Mid    | Post |
|---------|--------|--------|------|
| Imports | 125.00 | 142.00 | 0.00 |
| Exports | 28.00  | 70.00  | 0.00 |
| Within  | 64.00  | 296.00 | 0.00 |
| Samples | 22.00  | 381.00 | 3.00 |

## J - Lothian

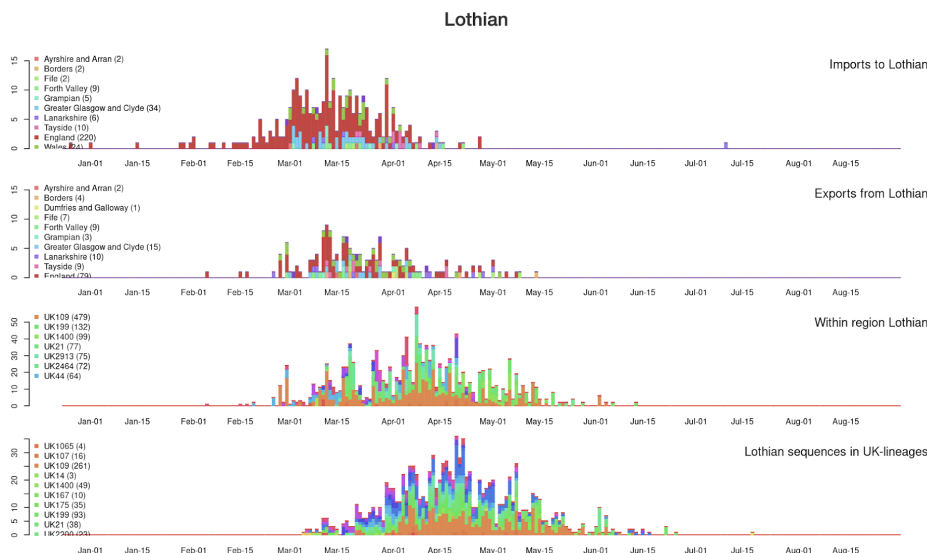

Summary for Health Board

|         | Pre    | Mid     | Post |
|---------|--------|---------|------|
| Imports | 238.00 | 80.00   | 0.00 |
| Exports | 95.00  | 74.00   | 0.00 |
| Within  | 339.00 | 1182.00 | 0.00 |
| Samples | 63.00  | 986.00  | 0.00 |

## K - Tayside

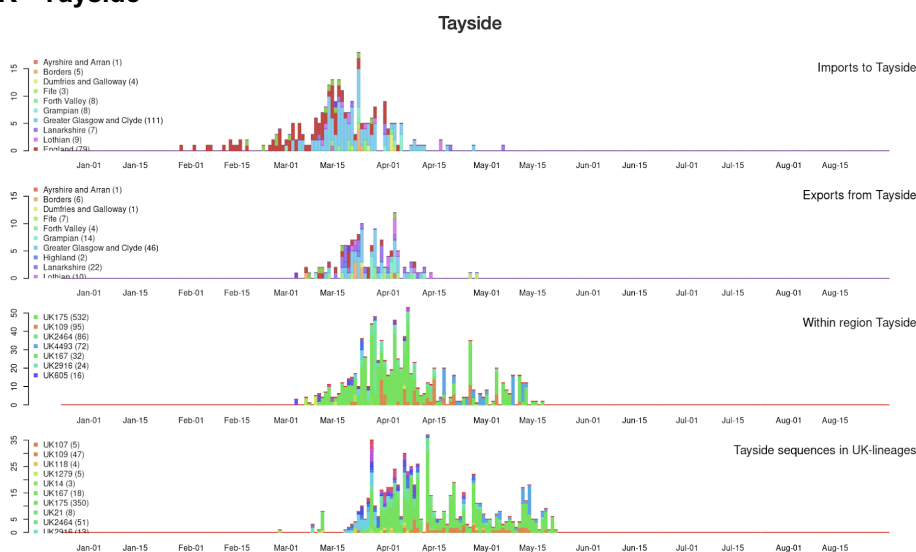

Summary for Health Board

|         | Pre    | Mid    | Post |
|---------|--------|--------|------|
| Imports | 173.00 | 75.00  | 0.00 |
| Exports | 53.00  | 84.00  | 0.00 |
| Within  | 129.00 | 812.00 | 0.00 |
| Samples | 23.00  | 655.00 | 0.00 |

**Supplementary figure 3.** Timing of the imports and exports to Scottish Health Boards for data to 2020-08-18 (see Methods). Results for Orkney, Shetland and the Western Isles are not included as there are too few sequences. The four plots for each NHS Health Board are as follows: top plot -- imports coloured by first NHS Health Board lineage detected in (rainbow colours) or England (red), Wales (green), Northern Ireland (purple). Note that the England (red) is a major source for both NHS Greater Glasgow and Clyde and Lothian in March; second row plot -- exports (same colouring as imports); third row plot -- within region transmissions coloured according to UK lineage number (other rainbow colours); bottom plot -- number of sequences per NHS Health Board coloured by UK lineage number (same as third row). For the summary tables, pre is before 23 March 2020, mid is 23 March - 10 July 2020, and post is after 10 July 2020.

Interactive versions available at <http://sars2.cvr.gla.ac.uk/RiseFallScotCOVID/>.

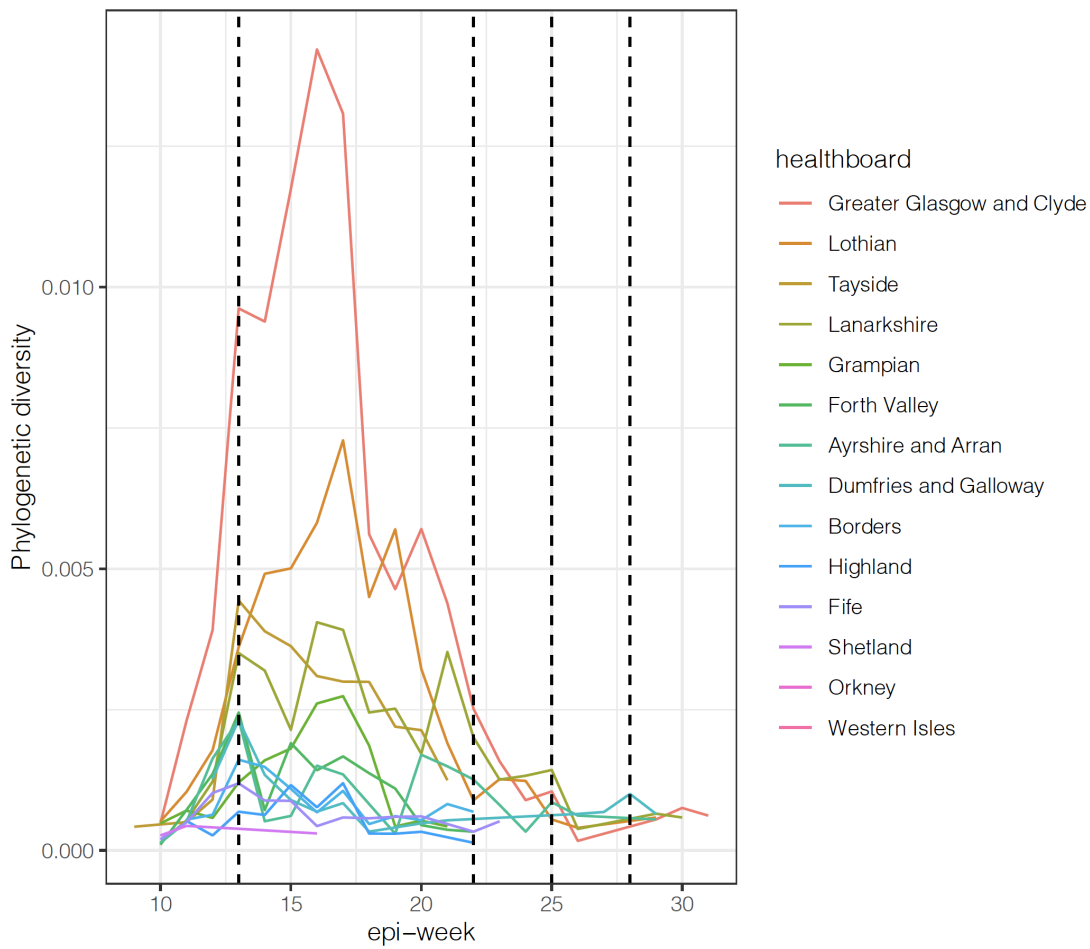

**Supplementary figure 4.** Phylogenetic diversity plotted against epi-week for each Scottish Health Board. The four vertical dashed lines represent the beginning of the lockdown (23rd March 2020) and its easing: movement to phase 1 (29th March 2020), phase 2 (19th June 2020) and phase 3 (10th July 2020).

Number of sequences 2020-10-21

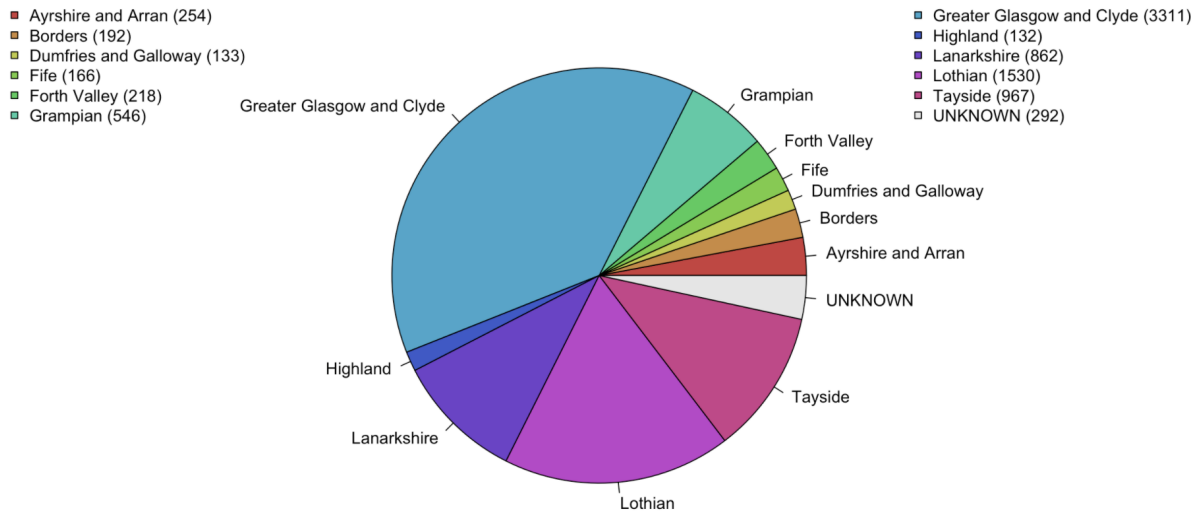

Number of sequences 2020-10-21

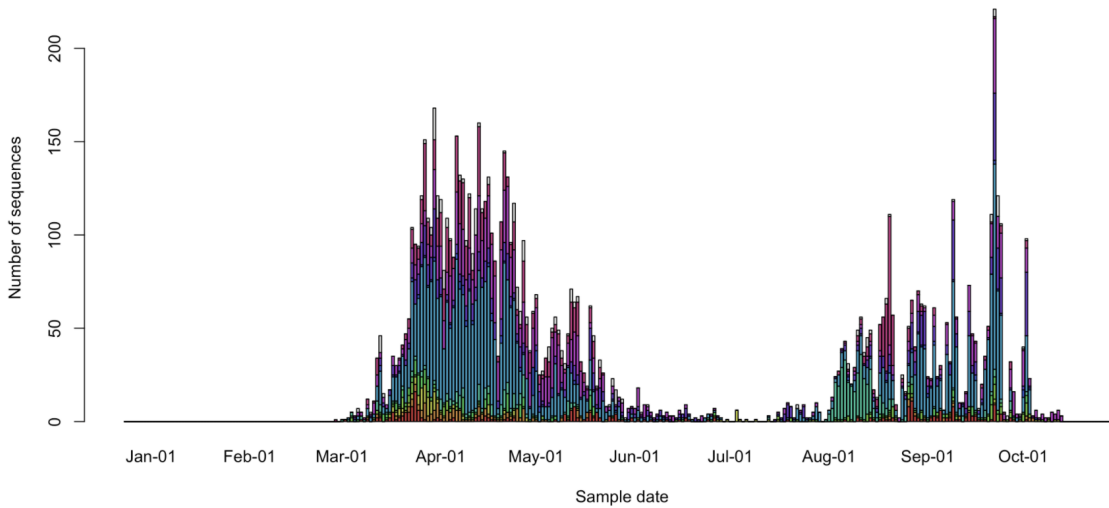

**Supplementary figure 5.** Sequence counts by Scottish Health Board (top) and by sampling time (bottom) to 21st October 2020.



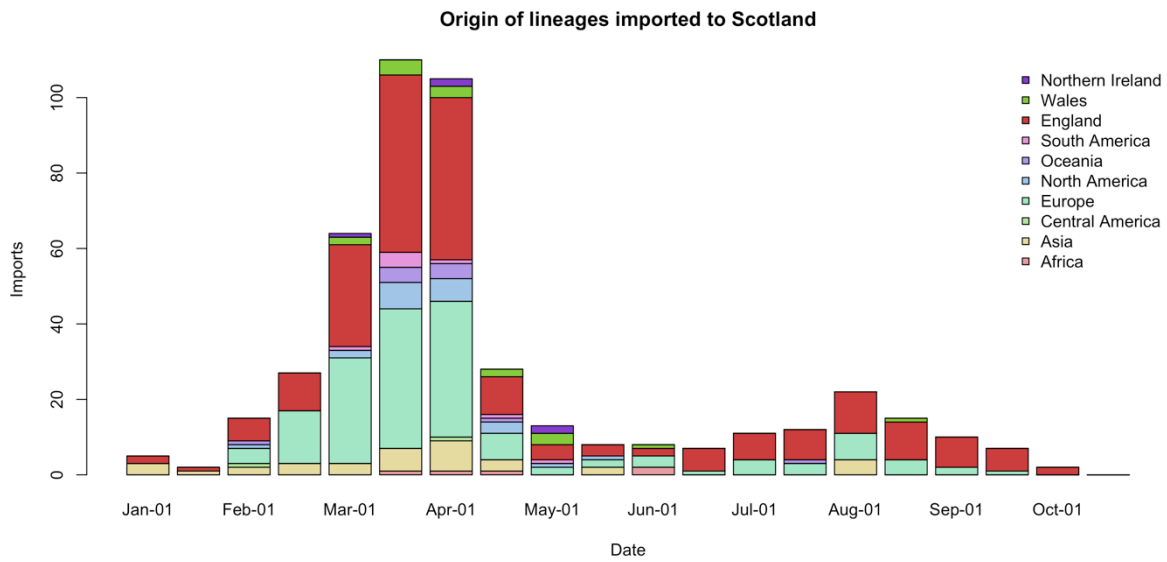

**Supplementary figure 6.** Estimate of the origin and timing of imports into Scotland using data to 21st October 2020.

## A – Ayrshire and Arran

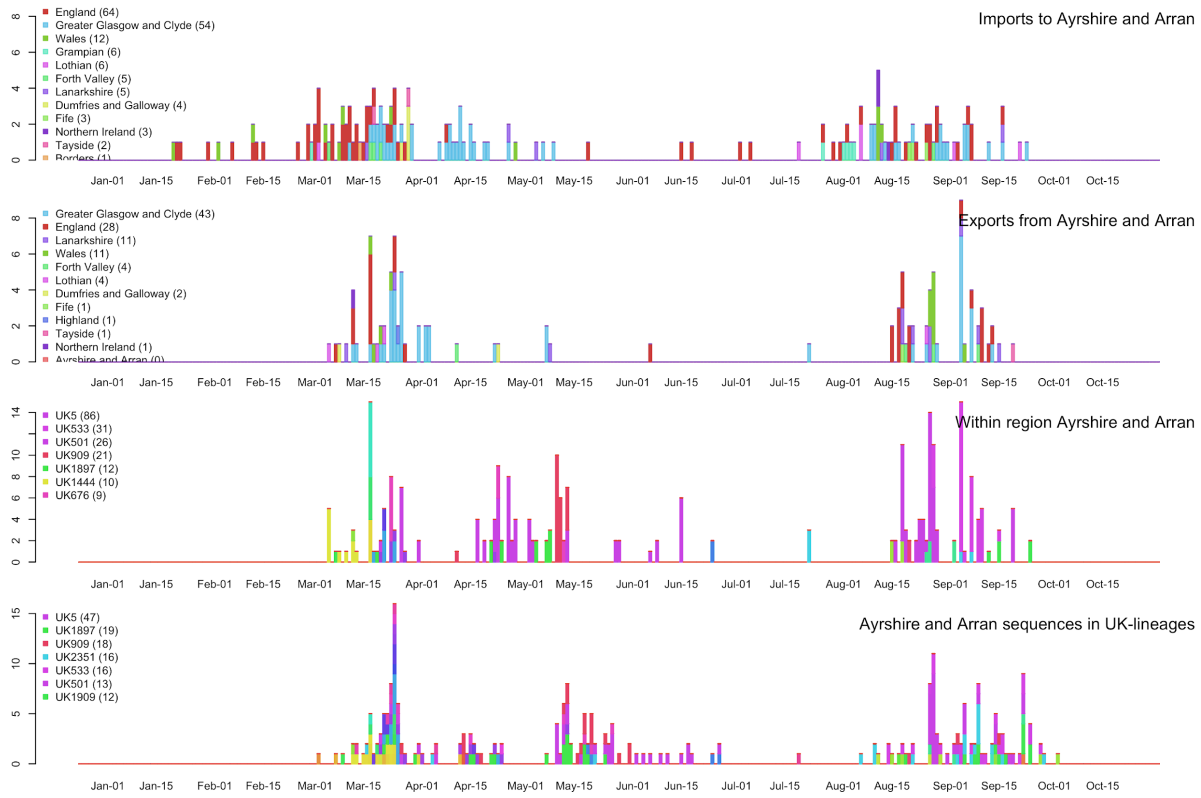

## B - Borders

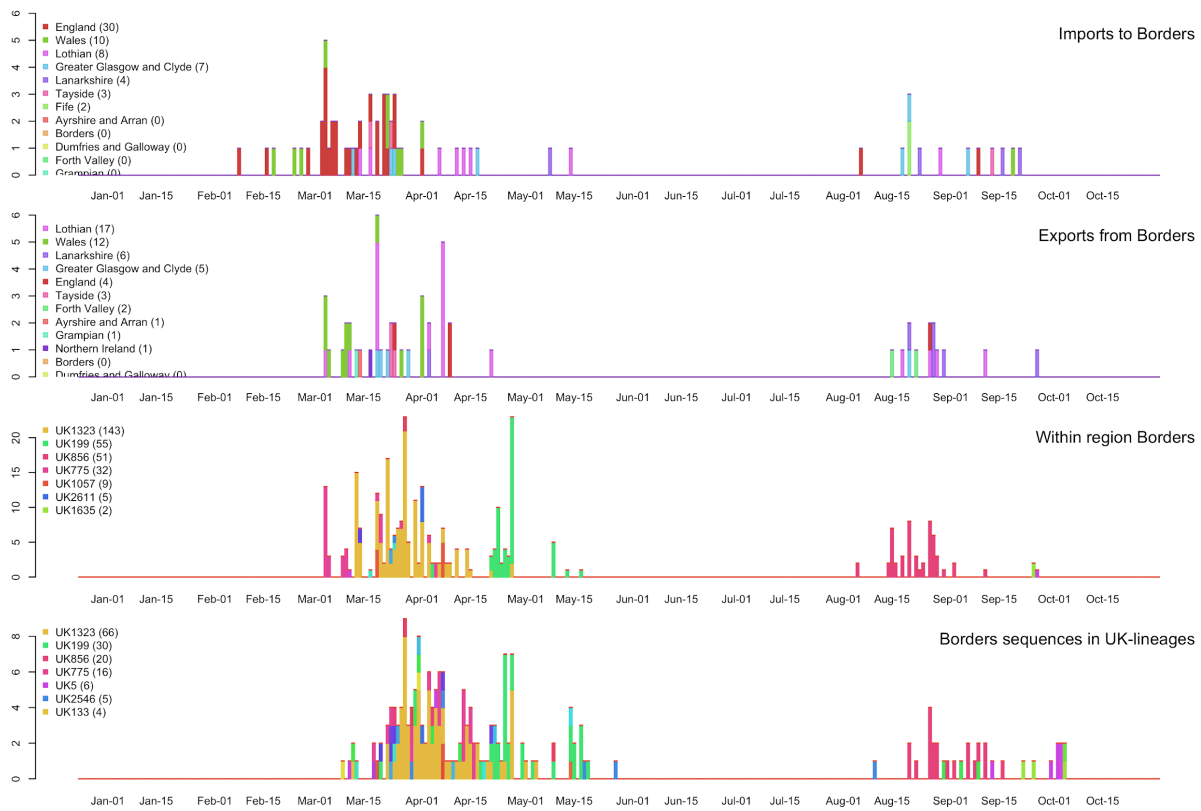

## C – Dumfries and Galloway

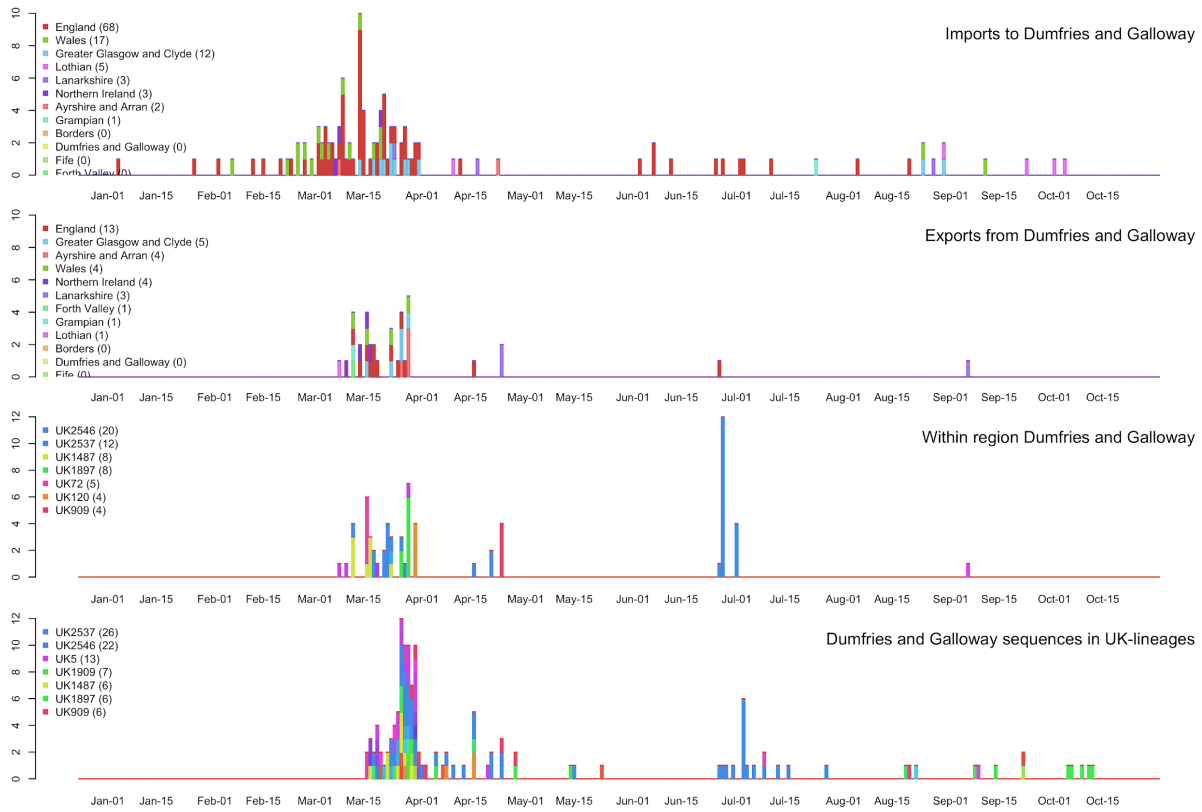

## D – Fife

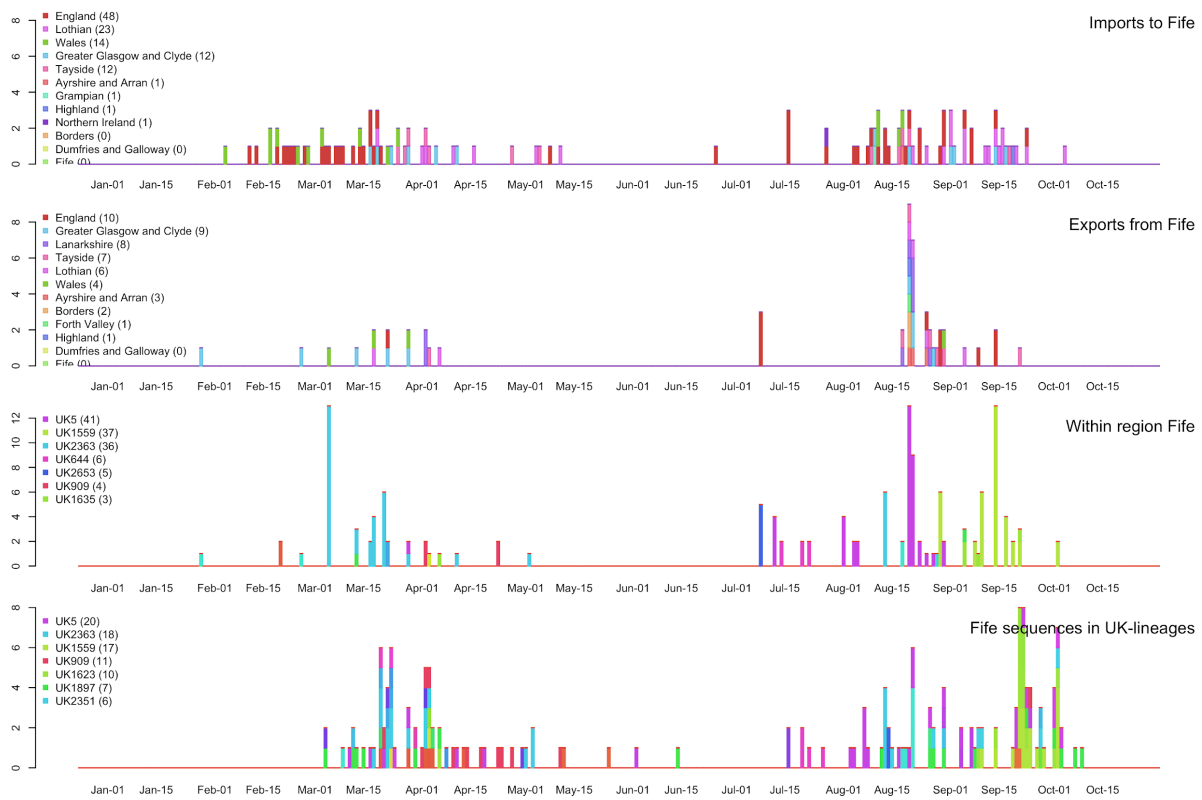

## E – Forth Valley

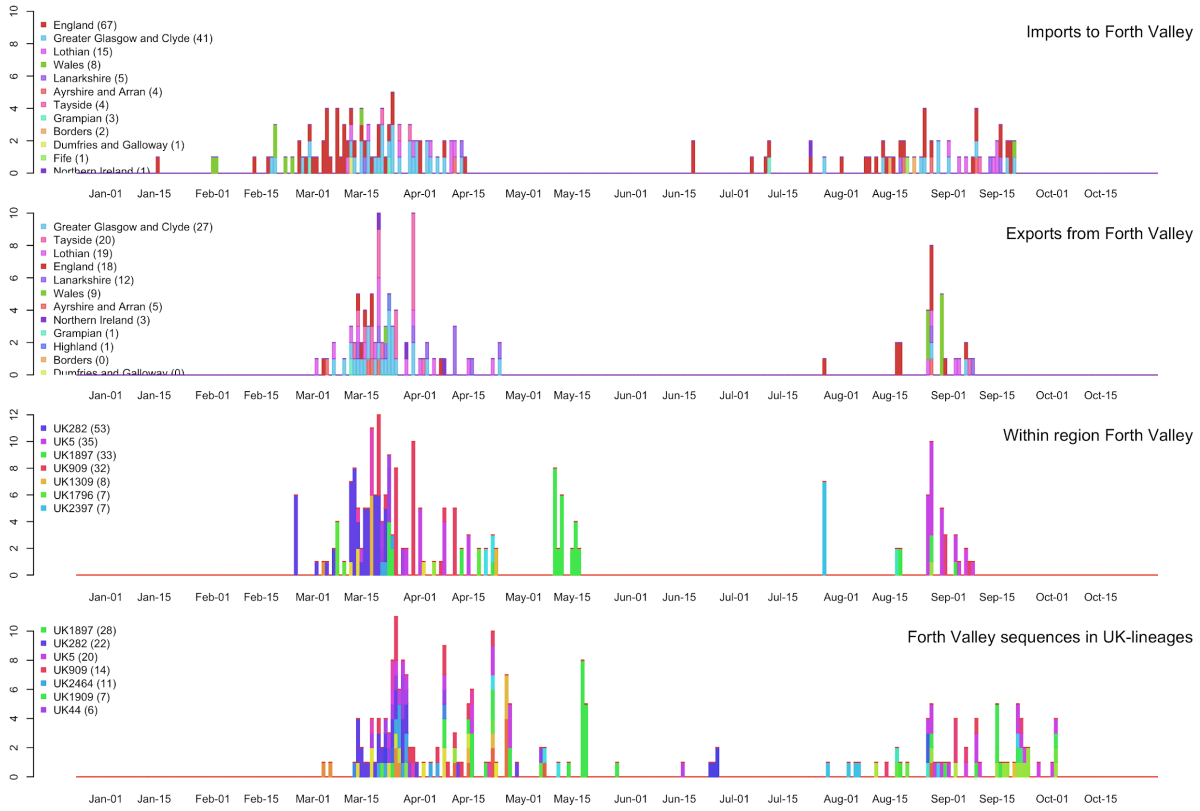

## F – Grampian

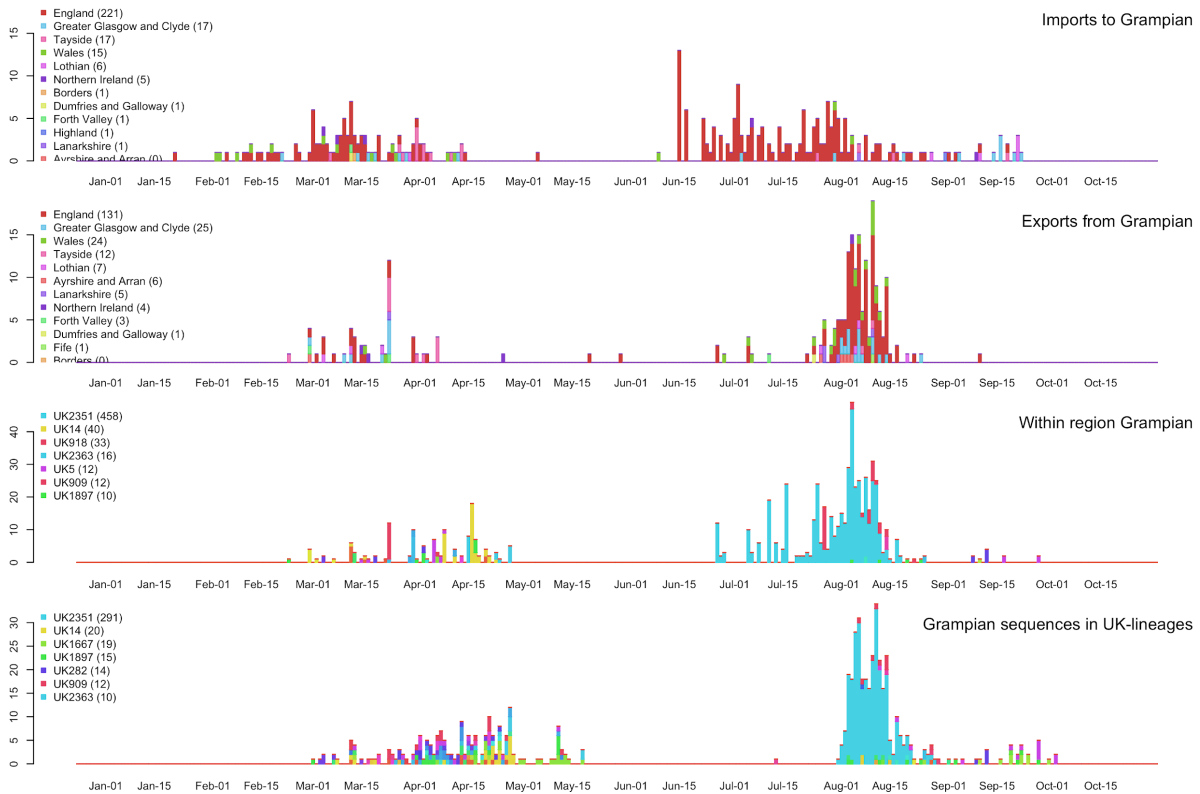

## G – Greater Glasgow and Clyde

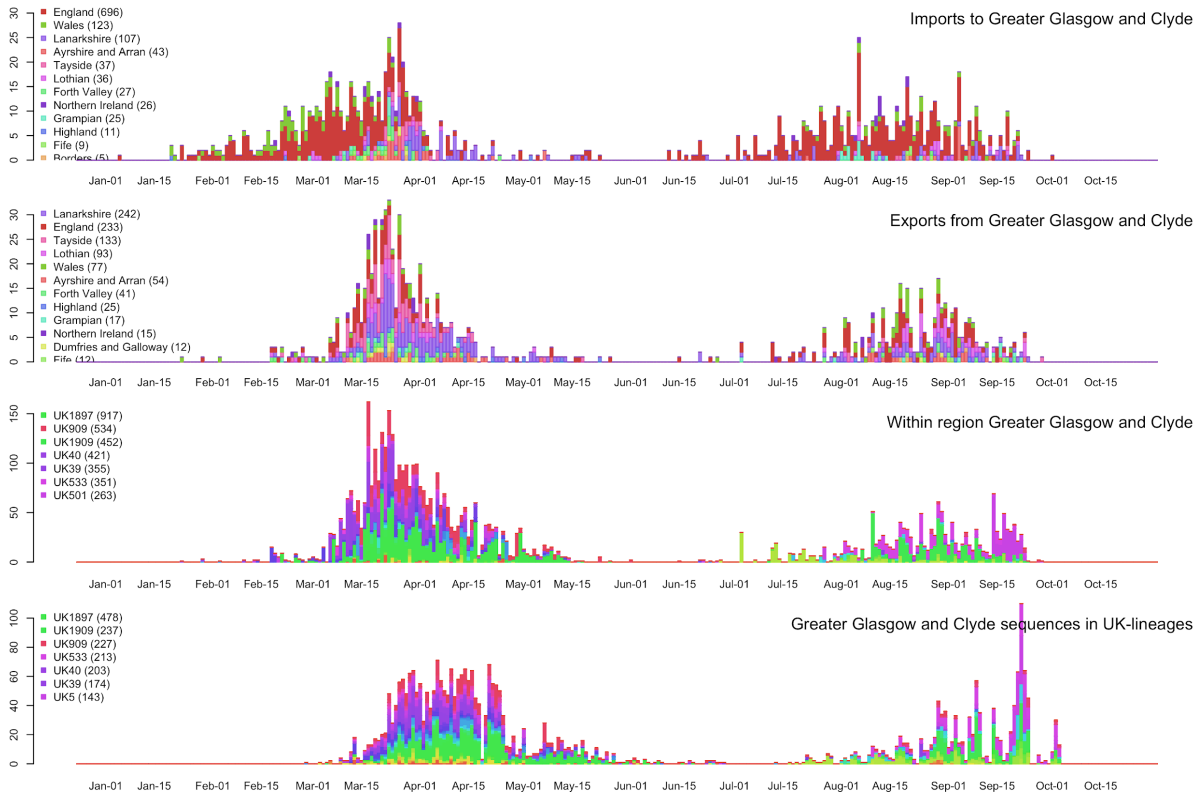

## H - Highland

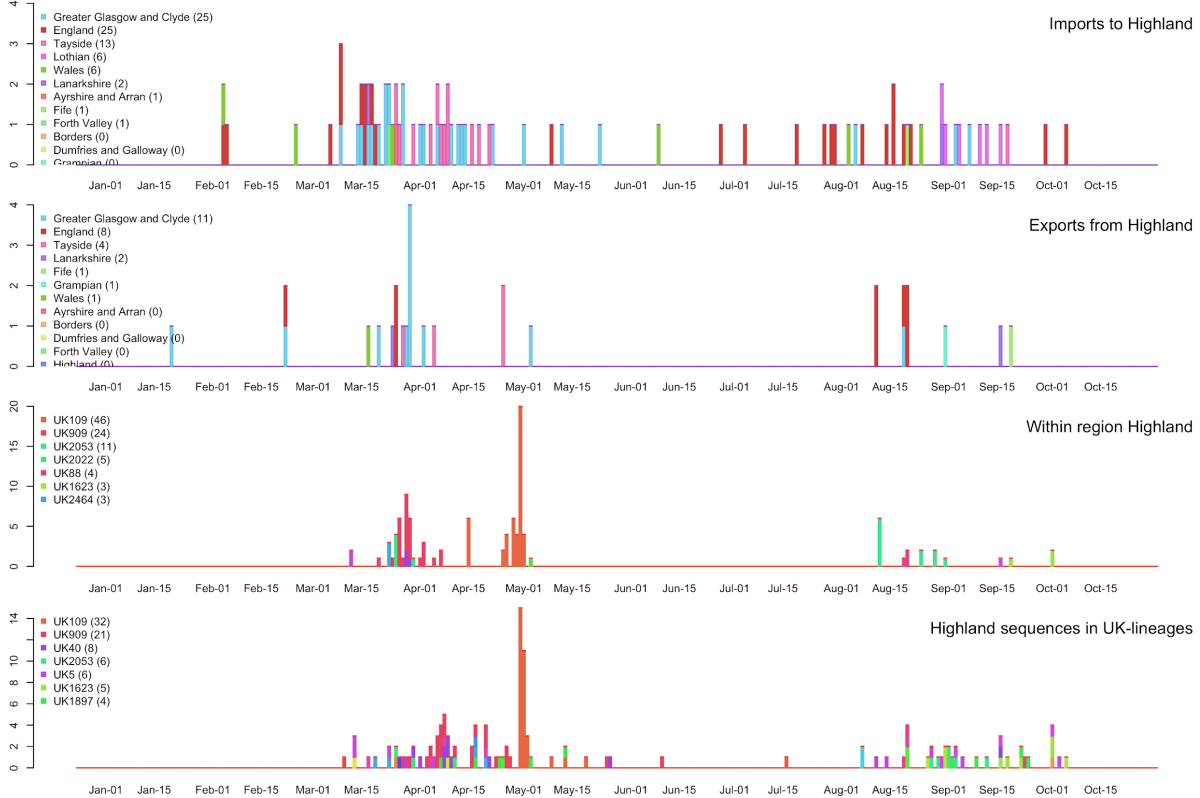

## I - Lanarkshire

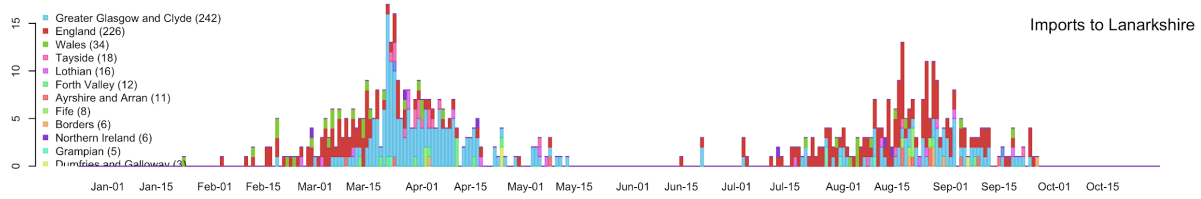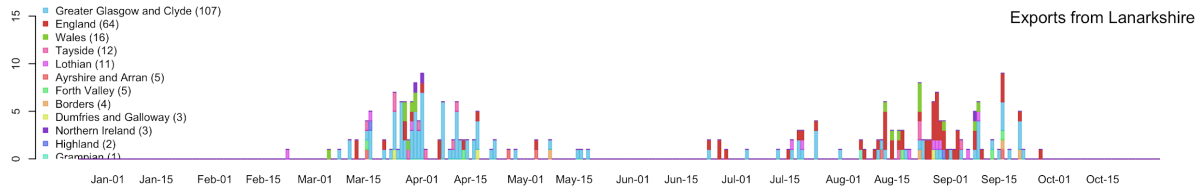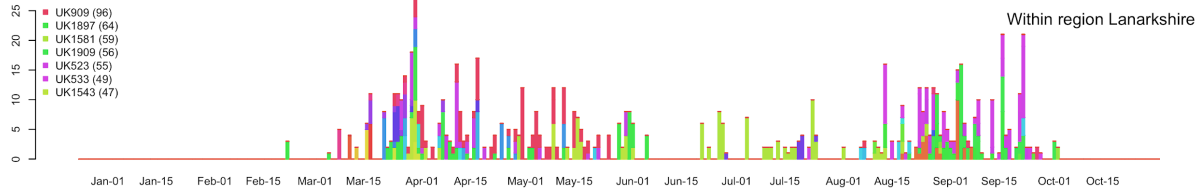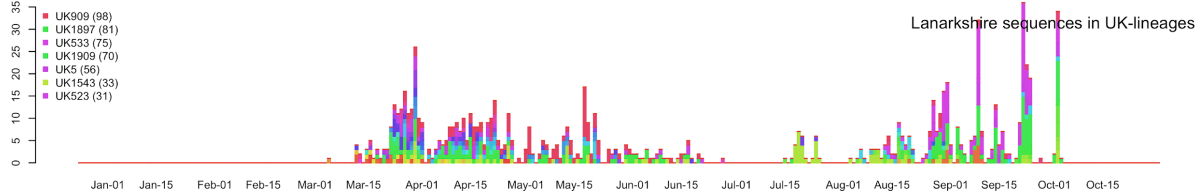

## J - Lothian

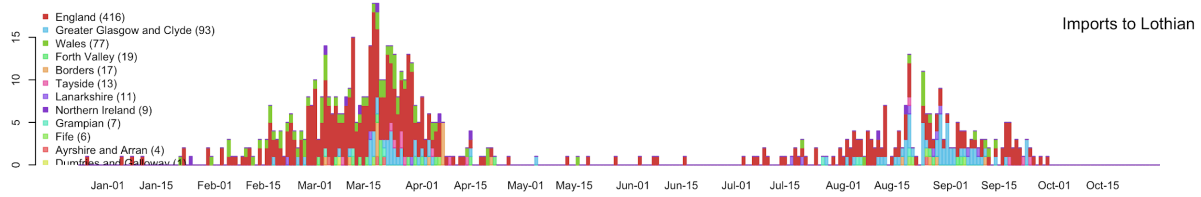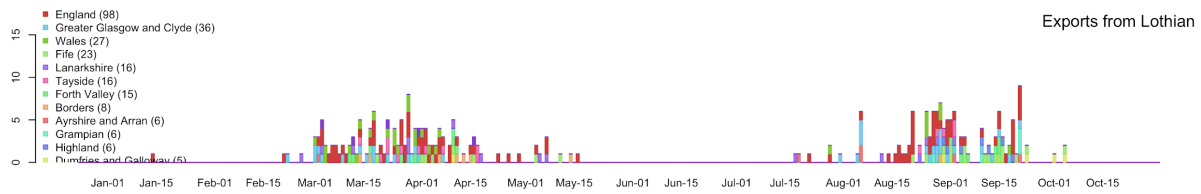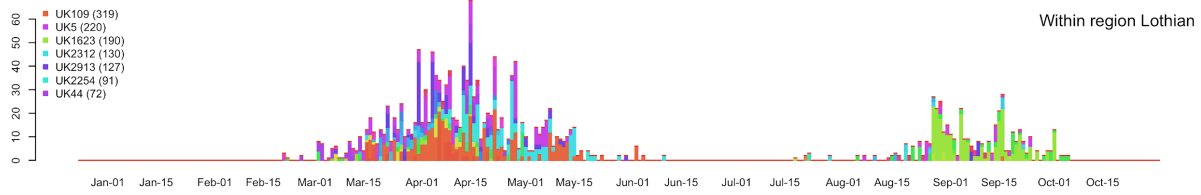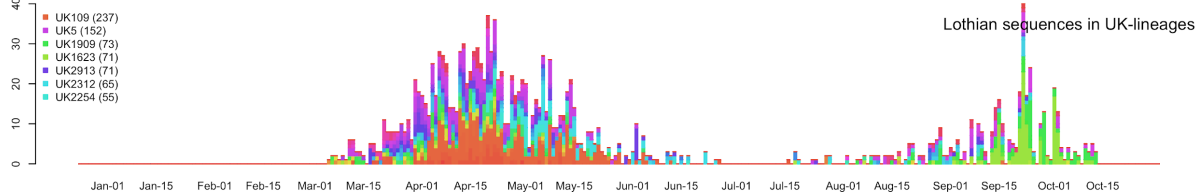

## K – Tayside

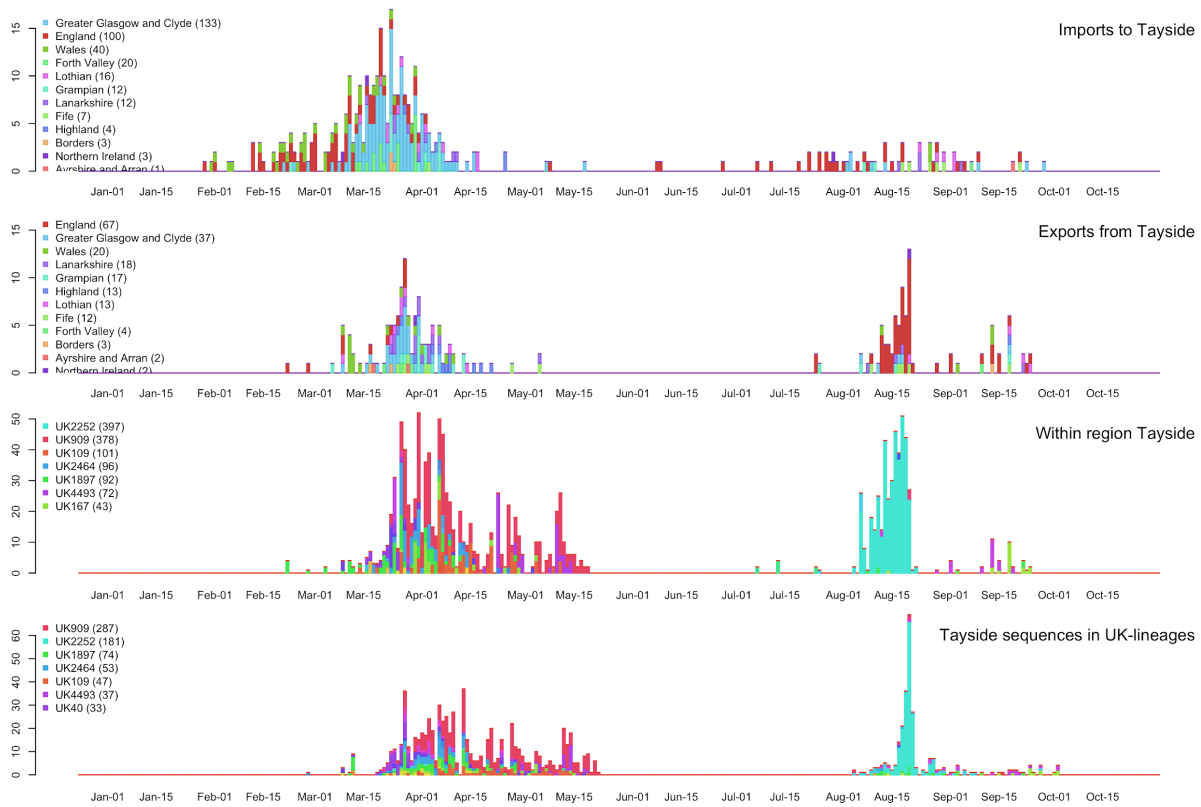

**Supplementary figure 7:** Timing of the imports and exports to Scottish NHS Health Boards with data to 2020-10-21. Results for Orkney, Shetland and the Western Isles are not included as there are too few sequences. The four plots for each NHS Health Board are as follows: top plot -- imports coloured by first NHS Health Board lineage detected in (rainbow colours) or England (red), Wales (green), Northern Ireland (purple). Note that the England (red) is a major source for both NHS Greater Glasgow and Clyde and Lothian in March; second row plot -- exports (same colouring as imports); third row plot -- within region transmissions coloured according to UK lineage number (other rainbow colours); bottom plot -- number of sequences per NHS Health Board coloured by UK lineage number (same as third row). Interactive plots can be found at <http://phyloinformatics.lycett.roslin.ed.ac.uk:3838/RiseFallScotCOVID/>

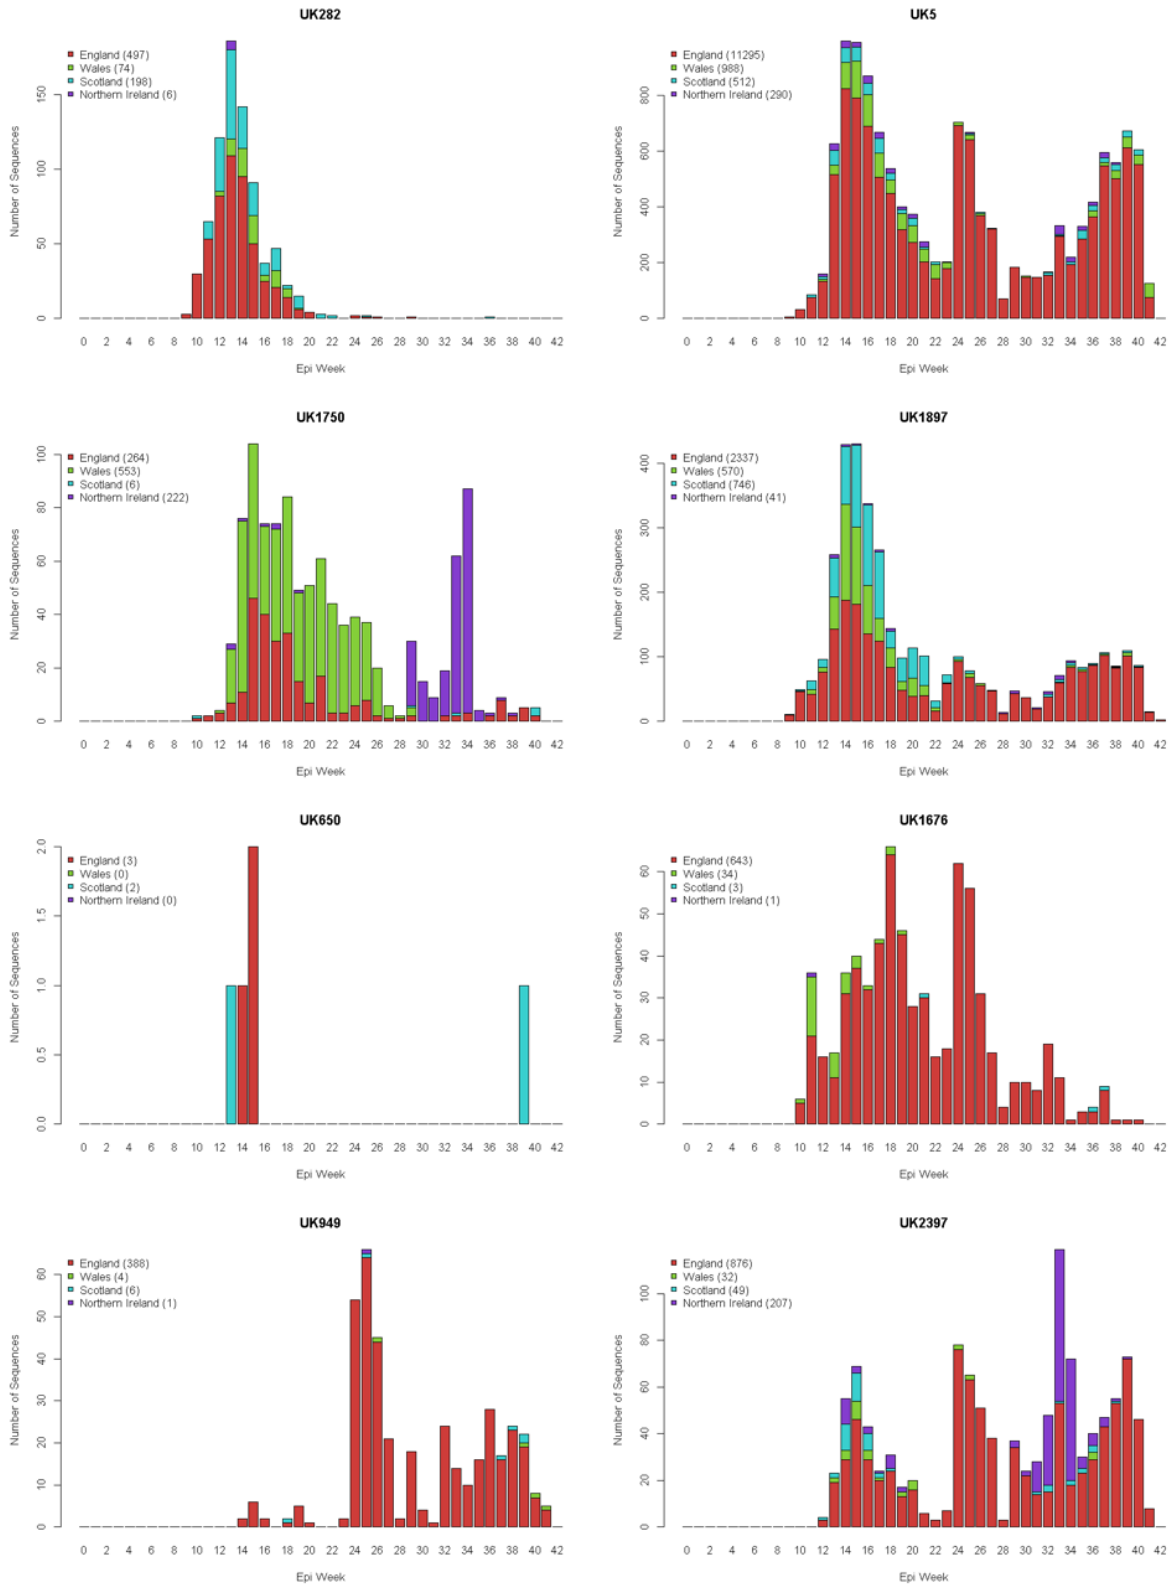

**Supplementary figure 8** (continued next page) Persisting lineages in Scotland -- number of sequences in England, Wales, Scotland and Northern Ireland with time for the selected 'persisting in Scotland' lineages, i.e., present in Scotland before 17th July and after 30th August.



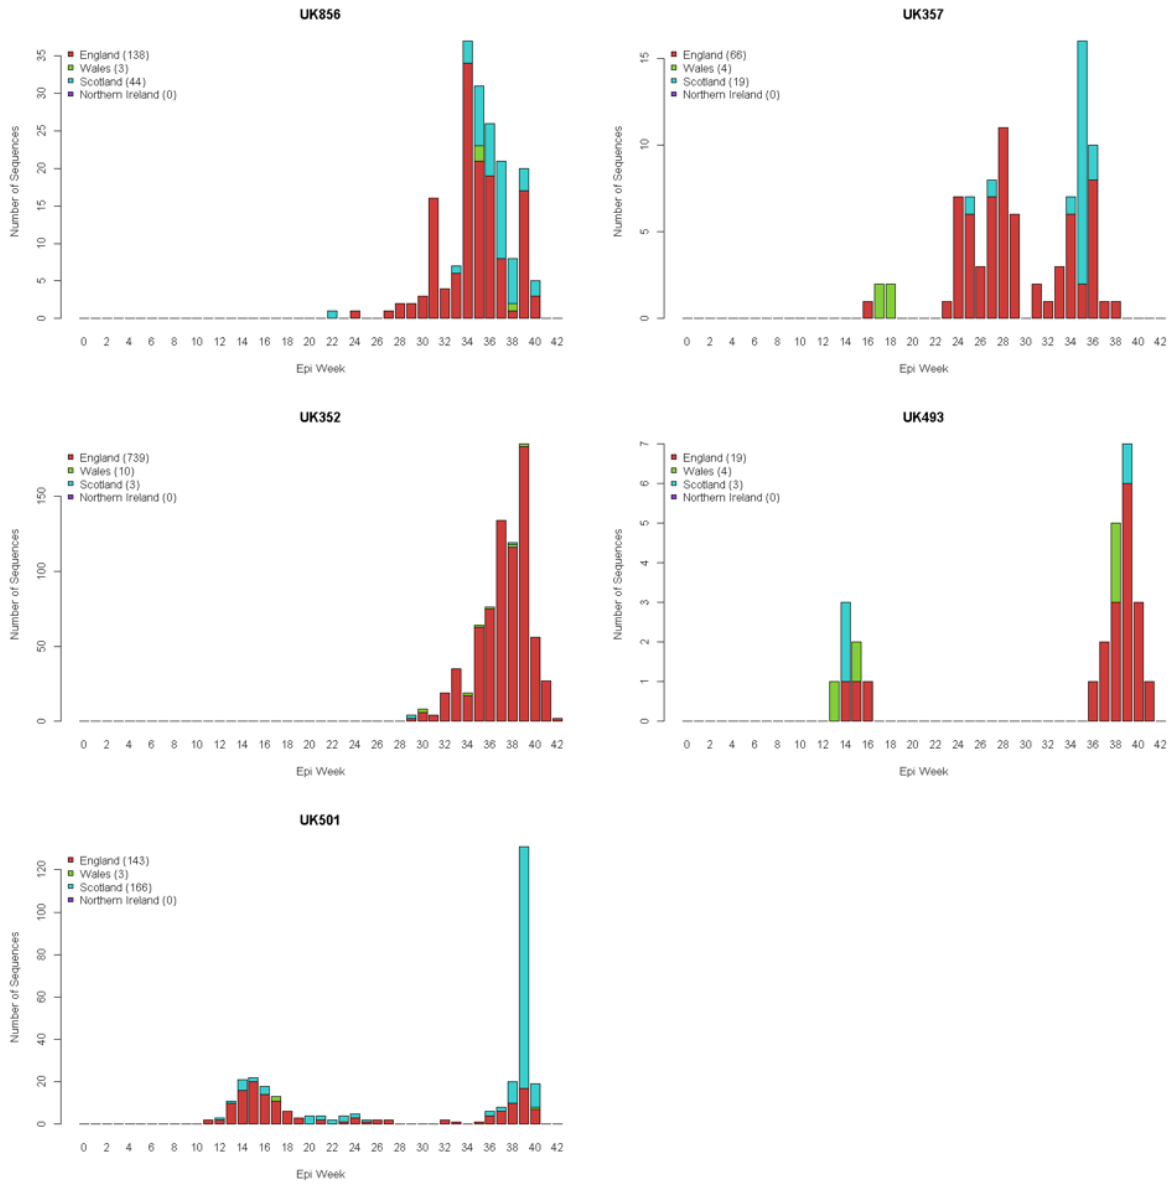

**Supplementary figure 8.** Persisting lineages in Scotland -- number of sequences in England, Wales, Scotland and Northern Ireland with time for the selected 'persisting in Scotland' lineages, i.e., present in Scotland before 17th July and after 30th August.

**Supplementary table 1.** Total size of UK lineages with sequences in Scotland both before epi-week 30 and after epi-week 36.

| Number of Sequences | UK650 | UK493 | UK357 | UK856 | UK501 | UK949 | UK1676 | UK352 | UK282 | UK1750 | UK2397 | UK1897 | UK5   |
|---------------------|-------|-------|-------|-------|-------|-------|--------|-------|-------|--------|--------|--------|-------|
| Total               | 5     | 26    | 89    | 185   | 312   | 399   | 681    | 752   | 775   | 1045   | 1164   | 3694   | 13085 |
| England             | 3     | 19    | 66    | 138   | 143   | 388   | 643    | 739   | 497   | 264    | 876    | 2337   | 11295 |
| Wales               | 0     | 4     | 4     | 3     | 3     | 4     | 34     | 10    | 74    | 553    | 32     | 570    | 988   |
| Scotland            | 2     | 3     | 19    | 44    | 166   | 6     | 3      | 3     | 198   | 6      | 49     | 746    | 512   |
| Northern Ireland    | 0     | 0     | 0     | 0     | 0     | 1     | 1      | 0     | 6     | 222    | 207    | 41     | 290   |

**Supplementary table 2.** Summary of origin and date range for imported UK lineages to Scotland.

| Number of Imports | Before Mar 23 | Mar 23 - Jul 17 | Jul 17 - Aug 30 | After Aug 30 |
|-------------------|---------------|-----------------|-----------------|--------------|
| All(inc Scot)     | 317           | 153             | 50              | 9            |
| All(not Scot)     | 285           | 131             | 46              | 9            |
| England           | 111           | 66              | 28              | 8            |
| Wales             | 8             | 7               | 1               | 0            |
| Scotland          | 32            | 22              | 4               | 0            |
| Northern Ireland  | 2             | 3               | 0               | 0            |
| Africa            | 2             | 3               | 0               | 0            |
| Asia              | 24            | 7               | 4               | 0            |
| Central America   | 1             | 1               | 0               | 0            |
| Europe            | 107           | 34              | 13              | 1            |
| North America     | 15            | 6               | 0               | 0            |
| Oceania           | 9             | 2               | 0               | 0            |
| South America     | 6             | 2               | 0               | 0            |

**Supplementary table 3.** Relative contribution to sequences detected in Scotland by A| lineages originating in the summer (left), and B| lineages originating in the autumn (right).

| Summer Origin    | Number of Lineages | Number of Scot. Seqs | Scot Contrib% | Autumn Origin    | Number of Lineages | Number of Scot. Seqs | Scot Contrib% |
|------------------|--------------------|----------------------|---------------|------------------|--------------------|----------------------|---------------|
| All(inc Scot)    | 50                 | 773                  | 26.82         | All(inc Scot)    | 9                  | 18                   | 1.07          |
| All(not Scot)    | 46                 | 763                  | 26.47         | All(not Scot)    | 9                  | 18                   | 1.07          |
| England          | 28                 | 255                  | 8.85          | England          | 8                  | 17                   | 1.01          |
| Wales            | 1                  | 2                    | 0.07          | Wales            | 0                  | 0                    | 0.00          |
| Scotland         | 4                  | 10                   | 0.35          | Scotland         | 0                  | 0                    | 0.00          |
| Northern Ireland | 0                  | 0                    | 0.00          | Northern Ireland | 0                  | 0                    | 0.00          |
| Africa           | 0                  | 0                    | 0.00          | Africa           | 0                  | 0                    | 0.00          |
| Asia             | 4                  | 28                   | 0.97          | Asia             | 0                  | 0                    | 0.00          |
| Central America  | 0                  | 0                    | 0.00          | Central America  | 0                  | 0                    | 0.00          |
| Europe           | 13                 | 478                  | 16.59         | Europe           | 1                  | 1                    | 0.06          |
| North America    | 0                  | 0                    | 0.00          | North America    | 0                  | 0                    | 0.00          |
| Oceania          | 0                  | 0                    | 0.00          | Oceania          | 0                  | 0                    | 0.00          |
| South America    | 0                  | 0                    | 0.00          | South America    | 0                  | 0                    | 0.00          |

**Supplementary table 4.** – Details of summer lineage imports to Scotland (17th Jul to 30th August) -- lineages with  $\geq 3$  Scottish sequences are listed (there are more with just 1 or 2 Scottish sequences).

| UKLineage | ImportEpiweek | ImportDate | Earliest case | England | Wales | Scotland | Northern Ireland | ScotContrib% |
|-----------|---------------|------------|---------------|---------|-------|----------|------------------|--------------|
| UK1909    | 30            | 24/07/2020 | Europe        | 244     | 267   | 426      | 5                | 14.781       |
| UK1635    | 33            | 11/08/2020 | England       | 1417    | 254   | 75       | 3                | 2.602        |
| UK847     | 30            | 21/07/2020 | England       | 718     | 13    | 37       | 11               | 1.284        |
| UK1881    | 34            | 17/08/2020 | England       | 507     | 7     | 26       | 0                | 0.902        |
| UK186     | 31            | 30/07/2020 | England       | 113     | 24    | 21       | 0                | 0.729        |
| UK1119    | 34            | 18/08/2020 | Europe        | 33      | 1     | 20       | 0                | 0.694        |
| UK924     | 31            | 31/07/2020 | England       | 10      | 1     | 16       | 0                | 0.555        |
| UK1879    | 31            | 30/07/2020 | England       | 192     | 56    | 13       | 4                | 0.451        |
| UK529     | 30            | 19/07/2020 | Asia          | 1       | 0     | 13       | 0                | 0.451        |
| UK2837    | 33            | 15/08/2020 | England       | 59      | 1     | 11       | 2                | 0.382        |
| UK918     | 31            | 27/07/2020 | Asia          | 25      | 5     | 11       | 0                | 0.382        |
| UK1898    | 31            | 27/07/2020 | England       | 48      | 4     | 10       | 5                | 0.347        |
| UK2402    | 29            | 18/07/2020 | Europe        | 19      | 0     | 10       | 0                | 0.347        |
| UK2657    | 33            | 15/08/2020 | England       | 29      | 0     | 7        | 0                | 0.243        |
| UK911     | 30            | 22/07/2020 | England       | 2       | 0     | 6        | 0                | 0.208        |
| UK1084    | 34            | 20/08/2020 | England       | 12      | 0     | 4        | 0                | 0.139        |
| UK1242    | 35            | 24/08/2020 | Scotland      | 0       | 0     | 4        | 0                | 0.139        |
| UK1249    | 30            | 21/07/2020 | Europe        | 118     | 5     | 4        | 3                | 0.139        |
| UK1656    | 32            | 03/08/2020 | England       | 69      | 3     | 4        | 0                | 0.139        |
| UK1793    | 33            | 12/08/2020 | England       | 24      | 0     | 4        | 1                | 0.139        |
| UK2079    | 35            | 25/08/2020 | Europe        | 0       | 0     | 4        | 0                | 0.139        |
| UK2082    | 32            | 02/08/2020 | Europe        | 0       | 0     | 4        | 0                | 0.139        |
| UK1538    | 31            | 31/07/2020 | Asia          | 8       | 0     | 3        | 0                | 0.104        |
| UK2223    | 34            | 19/08/2020 | England       | 28      | 0     | 3        | 0                | 0.104        |
| UK2591    | 33            | 12/08/2020 | Europe        | 1       | 0     | 3        | 0                | 0.104        |

**Supplementary table 5.** Details of autumn lineage imports to Scotland from 30st August to 21st October (all listed).

| UKLineage | ImportEpiweek | ImportDate | Earliest case | England | Wales | Scotland | Northern Ireland | ScotContrib% |
|-----------|---------------|------------|---------------|---------|-------|----------|------------------|--------------|
| UK2369    | 38            | 16/09/2020 | England       | 19      | 6     | 5        | 0                | 0.297        |
| UK855     | 37            | 06/09/2020 | England       | 18      | 0     | 4        | 0                | 0.237        |
| UK1892    | 36            | 05/09/2020 | England       | 73      | 1     | 2        | 1                | 0.119        |
| UK2592    | 36            | 02/09/2020 | England       | 104     | 1     | 2        | 0                | 0.119        |
| UK1337    | 37            | 12/09/2020 | Europe        | 1       | 0     | 1        | 0                | 0.059        |
| UK1464    | 36            | 03/09/2020 | England       | 28      | 0     | 1        | 0                | 0.059        |
| UK1670    | 39            | 25/09/2020 | England       | 173     | 3     | 1        | 0                | 0.059        |
| UK53      | 37            | 10/09/2020 | England       | 22      | 2     | 1        | 1                | 0.059        |
| UK952     | 36            | 03/09/2020 | England       | 58      | 1     | 1        | 3                | 0.059        |

**Supplementary table 6** -- GISAID acknowledgment file (see separate file).

**Appendix** -- COG-UK Authorship list (see separate file).
