# Supplementary material for: Epidemic waves of COVID-19 in Scotland: a genomic perspective on the impact of the introduction and relaxation of lockdown on SARS-CoV-2
Source: bioRxiv or medRxiv preprint supplement (doi:10.1101/2021.01.08.20248677), 2021-01-20
Supplement: Supplementary file [file media-2.pdf]

**Funding acquisition, leadership, supervision, metadata curation, project administration, samples, logistics, Sequencing, analysis, and Software and analysis tools:**

Dr Thomas R Connor PhD<sup>33, 34</sup>, and Professor Nicholas J Loman PhD<sup>15</sup>.

**Leadership, supervision, sequencing, analysis, funding acquisition, metadata curation, project administration, samples, logistics, and visualisation:**

Dr Samuel C Robson Ph.D <sup>68</sup>.

**Leadership, supervision, project administration, visualisation, samples, logistics, metadata curation and software and analysis tools:**

Dr Tanya Golubchik PhD <sup>27</sup>.

**Leadership, supervision, metadata curation, project administration, samples, logistics sequencing and analysis:**

Dr M. Estee Torok FRCP <sup>8, 10</sup>.

**Project administration, metadata curation, samples, logistics, sequencing, analysis, and software and analysis tools:**

Dr William L Hamilton PhD <sup>8, 10</sup>.

**Leadership, supervision, samples logistics, project administration, funding acquisition sequencing and analysis:**

Dr David Bonsall PhD <sup>27</sup>.

**Leadership and supervision, sequencing, analysis, funding acquisition, visualisation and software and analysis tools:**

Dr Ali R Awan PhD <sup>74</sup>.

**Leadership and supervision, funding acquisition, sequencing, analysis, metadata curation, samples and logistics:**

Dr Sally Corden PhD <sup>33</sup>.

**Leadership supervision, sequencing analysis, samples, logistics, and metadata curation:**

Professor Ian Goodfellow PhD <sup>11</sup>.

**Leadership, supervision, sequencing, analysis, samples, logistics, and Project administration:**

Professor Darren L Smith PhD <sup>60, 61</sup>.

**Project administration, metadata curation, samples, logistics, sequencing and analysis:**

Dr Martin D Curran PhD <sup>14</sup>, and Dr Surendra Parmar PhD <sup>14</sup>.

**Samples, logistics, metadata curation, project administration sequencing and analysis:**

Dr James G Shepherd MBChB MRCP <sup>21</sup>.

**Sequencing, analysis, project administration, metadata curation and software and analysis tools:**

Dr Matthew D Parker PhD<sup>38</sup> and Dr Dinesh Aggarwal MRCP<sup>1,2,3</sup>.

**Leadership, supervision, funding acquisition, samples, logistics, and metadata curation:**

Dr Catherine Moore<sup>33</sup>.

**Leadership, supervision, metadata curation, samples, logistics, sequencing and analysis:**

Dr Derek J Fairley PhD<sup>6,88</sup>, Professor Matthew W Loose PhD<sup>54</sup>, and Joanne Watkins MSc<sup>33</sup>.

**Metadata curation, sequencing, analysis, leadership, supervision and software and analysis tools:**

Dr Matthew Bull PhD<sup>33</sup>, and Dr Sam Nicholls PhD<sup>15</sup>.

**Leadership, supervision, visualisation, sequencing, analysis and software and analysis tools:**

Professor David M Aanensen PhD<sup>1,30</sup>.

**Sequencing, analysis, samples, logistics, metadata curation, and visualisation:**

Dr Sharon Glaysher<sup>70</sup>.

**Metadata curation, sequencing, analysis, visualisation, software and analysis tools:**

Dr Matthew Bashton PhD<sup>60</sup>, and Dr Nicole Pacchiarini PhD<sup>33</sup>.

**Sequencing, analysis, visualisation, metadata curation, and software and analysis tools:**

Dr Anthony P Underwood PhD<sup>1,30</sup>.

**Funding acquisition, leadership, supervision and project administration:**

Dr Thushan I de Silva PhD<sup>38</sup>, and Dr Dennis Wang PhD<sup>38</sup>.

**Project administration, samples, logistics, leadership and supervision:**

Dr Monique Andersson PhD<sup>28</sup>, Professor Anoop J Chauhan<sup>70</sup>, Dr Mariateresa de Cesare PhD<sup>26</sup>, Dr Catherine Ludden<sup>1,3</sup>, and Dr Tabitha W Mahungu FRCPATH<sup>91</sup>.

**Sequencing, analysis, project administration and metadata curation:**

Dr Rebecca Dewar PhD<sup>20</sup>, and Martin P McHugh MSc<sup>20</sup>.

**Samples, logistics, metadata curation and project administration:**

Dr Natasha G Jesudason MBChB MRCP FRCPATH<sup>21</sup>, Dr Kathy K Li MBBCh FRCPATH<sup>21</sup>, Dr Rajiv N Shah BMBS MRCP MSc<sup>21</sup>, and Dr Yusri Taha MD, PhD<sup>66</sup>.

**Leadership, supervision, funding acquisition and metadata curation:**

Dr Kate E Templeton PhD<sup>20</sup>.

**Leadership, supervision, funding acquisition, sequencing and analysis:**

Dr Simon Cottrell PhD<sup>33</sup>, Dr Justin O'Grady PhD<sup>51</sup>, Professor Andrew Rambaut DPhil<sup>19</sup>, and Professor Colin P Smith PhD<sup>93</sup>.

**Leadership, supervision, metadata curation, sequencing and analysis:**

Professor Matthew T.G. Holden PhD <sup>87</sup>, and Professor Emma C Thomson PhD/FRCP <sup>21</sup>.

**Leadership, supervision, samples, logistics and metadata curation:**

Dr Samuel Moses MD <sup>81,82</sup>.

**Sequencing, analysis, leadership, supervision, samples and logistics:**

Dr Meera Chand <sup>7</sup>, Dr Chrystala Constantinidou PhD <sup>71</sup>, Professor Alistair C Darby PhD <sup>46</sup>, Professor Julian A Hiscox PhD <sup>46</sup>, Professor Steve Paterson PhD <sup>46</sup>, and Dr Meera Unnikrishnan PhD <sup>71</sup>.

**Sequencing, analysis, leadership and supervision and software and analysis tools:**

Dr Andrew J Page PhD <sup>51</sup>, and Dr Erik M Volz PhD<sup>96</sup>.

**Samples, logistics, sequencing, analysis and metadata curation:**

Dr Charlotte J Houldcroft PhD <sup>8</sup>, Dr Aminu S Jahun PhD <sup>11</sup>, Dr James P McKenna PhD <sup>88</sup>, Dr Luke W Meredith PhD <sup>11</sup>, Dr Andrew Nelson PhD <sup>61</sup>, Sarojini Pandey MSc <sup>72</sup>, and Dr Gregory R Young PhD <sup>60</sup>.

**Sequencing, analysis, metadata curation, and software and analysis tools:**

Dr Anna Price PhD<sup>34</sup>, Dr Sara Rey PhD <sup>33</sup>, Dr Sunando Roy PhD <sup>41</sup>, Dr Ben Temperton Ph.D <sup>49</sup>, and Matthew Wyles <sup>38</sup>.

**Sequencing, analysis, metadata curation and visualisation:**

Stefan Rooke MSc<sup>19</sup>, and Dr Sharif Shaaban PhD<sup>87</sup>.

**Visualisation, sequencing, analysis and software and analysis tools:**

Dr Helen Adams PhD <sup>35</sup>, Dr Yann Bourgeois Ph.D <sup>69</sup>, Dr Katie F Loveson Ph.D <sup>68</sup>, Áine O'Toole MSc<sup>19</sup>, and Richard Stark MSc <sup>71</sup>.

**Project administration, leadership and supervision:**

Dr Ewan M Harrison PhD <sup>1,3</sup>, David Heyburn <sup>33</sup>, and Professor Sharon J Peacock <sup>2,3</sup>

**Project administration and funding acquisition:**

Dr David Buck PhD<sup>26</sup>, and Michaela John BSc Hons <sup>36</sup>

**Sequencing, analysis and project administration:**

Dorota Jamrozy <sup>1</sup>, and Dr Joshua Quick PhD <sup>15</sup>

**Samples, logistics, and project administration:**

Dr Rahul Batra MD<sup>78</sup>, Katherine L Bellis BSc (Hons) <sup>1,3</sup>, Beth Blane BSc <sup>3</sup>, Sophia T Girgis MSc <sup>3</sup>, Dr Angie Green PhD <sup>26</sup>, Anita Justice MSc <sup>28</sup>, Dr Mark Kristiansen PhD <sup>41</sup>, and Dr Rachel J Williams PhD <sup>41</sup>.

**Project administration, software and analysis tools:**

Radoslaw Poplawski BSc <sup>15</sup>.

**Project administration and visualisation:**

Dr Garry P Scarlett Ph.D<sup>69</sup>.

**Leadership, supervision, and funding acquisition:**

Professor John A Todd PhD<sup>26</sup>, Dr Christophe Fraser PhD<sup>27</sup>, Professor Judith Breuer MD<sup>40,41</sup>, Professor Sergi Castellano PhD<sup>41</sup>, Dr Stephen L Mitchell PhD<sup>49</sup>, Professor Dimitris Gramatopoulos PhD, FRCPATH<sup>73</sup>, and Dr Jonathan Edgeworth PhD, FRCPATH<sup>78</sup>.

**Leadership, supervision and metadata curation:**

Dr Gemma L Kay PhD<sup>51</sup>.

**Leadership, supervision, sequencing and analysis:**

Dr Ana da Silva Filipe PhD<sup>21</sup>, Dr Aaron R Jeffries PhD<sup>49</sup>, Dr Sascha Ott PhD<sup>71</sup>, Professor Oliver Pybus<sup>24</sup>, Professor David L Robertson PhD<sup>21</sup>, Dr David A Simpson PhD<sup>6</sup>, and Dr Chris Williams MB BS<sup>33</sup>.

**Samples, logistics, leadership and supervision:**

Dr Cressida Auckland FRCPATH<sup>50</sup>, Dr John Boyes MBChB<sup>83</sup>, Dr Samir Dervisevic FRCPATH<sup>52</sup>, Professor Sian Ellard FRCPATH<sup>49,50</sup>, Dr Sonia Goncalves<sup>1</sup>, Dr Emma J Meader FRCPATH<sup>51</sup>, Dr Peter Muir PhD<sup>2</sup>, Dr Husam Osman PhD<sup>95</sup>, Reenesh Prakash MPH<sup>52</sup>, Dr Venkat Sivaprakasam PhD<sup>18</sup>, and Dr Ian B Vipond PhD<sup>2</sup>.

**Leadership, supervision and visualisation**

Dr Jane AH Masoli MBChB<sup>49,50</sup>.

**Sequencing, analysis and metadata curation**

Dr Nabil-Fareed Alikhan PhD<sup>51</sup>, Matthew Carlile BSc<sup>54</sup>, Dr Noel Craine DPhil<sup>33</sup>, Dr Sam T Haldenby PhD<sup>46</sup>, Dr Nadine Holmes PhD<sup>54</sup>, Professor Ronan A Lyons MD<sup>37</sup>, Dr Christopher Moore PhD<sup>54</sup>, Malorie Perry MSc<sup>33</sup>, Dr Ben Warne MRCP<sup>80</sup>, and Dr Thomas Williams MD<sup>19</sup>.

**Samples, logistics and metadata curation:**

Dr Lisa Berry PhD<sup>72</sup>, Dr Andrew Bosworth PhD<sup>95</sup>, Dr Julianne Rose Brown PhD<sup>40</sup>, Sharon Campbell MSc<sup>67</sup>, Dr Anna Casey PhD<sup>17</sup>, Dr Gemma Clark PhD<sup>56</sup>, Jennifer Collins BSc<sup>66</sup>, Dr Alison Cox PhD<sup>43,44</sup>, Thomas Davis MSc<sup>84</sup>, Gary Eltringham BSc<sup>66</sup>, Dr Cariad Evans<sup>38,39</sup>, Dr Clive Graham MD<sup>64</sup>, Dr Fenella Halstead PhD<sup>18</sup>, Dr Kathryn Ann Harris PhD<sup>40</sup>, Dr Christopher Holmes PhD<sup>58</sup>, Stephanie Hutchings<sup>2</sup>, Professor Miren Iturriza-Gomara PhD<sup>46</sup>, Dr Kate Johnson<sup>38,39</sup>, Katie Jones MSc<sup>72</sup>, Dr Alexander J Keeley MRCP<sup>38</sup>, Dr Bridget A Knight PhD<sup>49,50</sup>, Cherian Koshy MSc, CSci, FIBMS<sup>90</sup>, Steven Liggett<sup>63</sup>, Hannah Lowe MSc<sup>81</sup>, Dr Anita O Lucaci PhD<sup>46</sup>, Dr Jessica Lynch PhD MBChB<sup>25,29</sup>, Dr Patrick C McClure PhD<sup>55</sup>, Dr Nathan Moore MBChB<sup>31</sup>, Matilde Mori BSc<sup>25,29,32</sup>, Dr David G Partridge FRCP, FRCPATH<sup>38,39</sup>, PINGLATHEE MADONA<sup>43,44</sup>, Hannah M Pymont MSc<sup>2</sup>, Dr Paul Anthony Randell MBBCh<sup>43,44</sup>, Dr Mohammad Raza<sup>38,39</sup>, Felicity Ryan MSc<sup>81</sup>, Dr Robert Shaw FRCPATH<sup>28</sup>, Dr Tim J Sloan PhD<sup>57</sup>, and Emma Swindells BSc<sup>65</sup>.

**Sequencing, analysis, Samples and logistics:**

Alexander Adams BSc<sup>33</sup>, Dr Hibo Asad PhD<sup>33</sup>, Alec Birchley MSc<sup>33</sup>, Tony Thomas Brooks BSc (Hons)<sup>41</sup>, Dr Giselda Bucca PhD<sup>93</sup>, Ethan Butcher<sup>70</sup>, Dr Sarah L Caddy PhD<sup>13</sup>, Dr Laura G

Caller PhD <sup>2,3,12</sup>, Yasmin Chaudhry BSc <sup>11</sup>, Jason Coombes BSc (HONS) <sup>33</sup>, Michelle Cronin <sup>33</sup>, Patricia L Dyal MPhil <sup>41</sup>, Johnathan M Evans MSc <sup>33</sup>, Laia Fina <sup>33</sup>, Bree Gatica-Wilcox MPhil <sup>33</sup>, Dr Iliana Georgana PhD <sup>11</sup>, Lauren Gilbert A-Levels <sup>33</sup>, Lee Graham BSc <sup>33</sup>, Danielle C Groves BA <sup>38</sup>, Grant Hall BSc <sup>11</sup>, Ember Hilvers MPH <sup>33</sup>, Dr Myra Hosmillo PhD <sup>11</sup>, Hannah Jones <sup>33</sup>, Sophie Jones MSc <sup>33</sup>, Fahad A Khokhar BSc <sup>13</sup>, Sara Kumziene-Summerhayes MSc <sup>33</sup>, George MacIntyre-Cockett BSc <sup>26</sup>, Dr Rocio T Martinez Nunez PhD <sup>94</sup>, Dr Caoimhe McKerr PhD <sup>33</sup>, Dr Claire McMurray PhD <sup>15</sup>, Dr Richard Myers <sup>7</sup>, Yasmin Nicole Panchbhaya BSc <sup>41</sup>, Malte L Pinckert MPhil <sup>11</sup>, Amy Plimmer <sup>33</sup>, Dr Joanne Stockton PhD <sup>15</sup>, Sarah Taylor <sup>33</sup>, Dr Alicia Thornton <sup>7</sup>, Amy Trebes MSc <sup>26</sup>, Alexander J Trotter MRes <sup>51</sup>, Helena Jane Tutill BSc <sup>41</sup>, Charlotte A Williams BSc <sup>41</sup>, Anna Yakovleva BSc <sup>11</sup> and Dr Wen C Yew PhD <sup>62</sup>.

#### **Sequencing, analysis and software and analysis tools:**

Dr Mohammad T Alam PhD <sup>71</sup>, Dr Laura Baxter PhD <sup>71</sup>, Olivia Boyd MSc <sup>96</sup>, Dr Fabricia F. Nascimento PhD <sup>96</sup>, Timothy M Freeman MPhil <sup>38</sup>, Lily Geidelberg MSc <sup>96</sup>, Dr Joseph Hughes PhD <sup>21</sup>, David Jorgensen MSc <sup>96</sup>, Dr Benjamin B Lindsey MRCP <sup>38</sup>, Dr Richard J Orton PhD <sup>21</sup>, Dr Manon Ragonnet-Cronin PhD <sup>96</sup> Joel Southgate MSc <sup>33,34</sup>, and Dr Sreenu Vattipally PhD <sup>21</sup>.

#### **Samples, logistics and software and analysis tools:**

Dr Igor Starinskij MSc MRCP <sup>23</sup>.

#### **Visualisation and software and analysis tools:**

Dr Joshua B Singer PhD <sup>21</sup>, Dr Khalil Abudahab PhD <sup>1,30</sup>, Leonardo de Oliveira Martins PhD <sup>51</sup>, Dr Thanh Le-Viet PhD <sup>51</sup>, Mirko Menegazzo <sup>30</sup>, Ben EW Taylor Meng <sup>1,30</sup>, and Dr Corin A Yeats PhD <sup>30</sup>.

#### **Project Administration:**

Sophie Palmer <sup>3</sup>, Carol M Churcher <sup>3</sup>, Dr Alisha Davies <sup>33</sup>, Elen De Lacy MSc <sup>33</sup>, Fatima Downing <sup>33</sup>, Sue Edwards <sup>33</sup>, Dr Nikki Smith PhD <sup>38</sup>, Dr Francesc Coll PhD <sup>97</sup>, Dr Nazreen F Hadjirin PhD <sup>3</sup> and Dr Frances Bolt PhD <sup>44,45</sup>.

#### **Leadership and supervision:**

Dr. Alex Alderton <sup>1</sup>, Dr Matt Berriman <sup>1</sup>, Ian G Charles <sup>51</sup>, Dr Nicholas Cortes MBChB <sup>31</sup>, Dr Tanya Curran PhD <sup>88</sup>, Prof John Danesh <sup>1</sup>, Dr Sahar Eldirdiri MBBS, MSc FRCPATH <sup>84</sup>, Dr Ngozi Elumogo FRCPATH <sup>52</sup>, Prof Andrew Hattersley FRS <sup>49,50</sup>, Professor Alison Holmes MD <sup>44,45</sup>, Dr Robin Howe <sup>33</sup>, Dr Rachel Jones <sup>33</sup>, Anita Kenyon MSc <sup>84</sup>, Prof Robert A Kingsley PhD <sup>51</sup>, Professor Dominic Kwiatkowski <sup>1,9</sup>, Dr Cordelia Langford <sup>1</sup>, Dr Jenifer Mason MBBS <sup>48</sup>, Dr Alison E Mather PhD <sup>51</sup>, Lizzie Meadows MA <sup>51</sup>, Dr Sian Morgan FRCPATH <sup>36</sup>, Dr James Price PhD <sup>44,45</sup>, Trevor I Robinson MSc <sup>48</sup>, Dr Giri Shankar <sup>33</sup>, John Wain <sup>51</sup>, and Dr Mark A Webber PhD <sup>51</sup>.

#### **Metadata curation:**

Dr Declan T Bradley PhD <sup>5,6</sup>, Dr Michael R Chapman PhD <sup>1,3,4</sup>, Dr Derrick Crooke <sup>28</sup>, Dr David Eyre PhD <sup>28</sup>, Professor Martyn Guest PhD <sup>34</sup>, Huw Gulliver <sup>34</sup>, Dr Sarah Hoosdally <sup>28</sup>, Dr Christine Kitchen PhD <sup>34</sup>, Dr Ian Merrick PhD <sup>34</sup>, Siddharth Mookerjee MPH <sup>44,45</sup>, Robert Munn BSc <sup>34</sup>, Professor Timothy Peto PhD <sup>28</sup>, Will Potter <sup>52</sup>, Dr Dheeraj K Sethi MBBS <sup>52</sup>, Wendy Smith <sup>56</sup>, Dr Luke B Snell MB BS <sup>75,94</sup>, Dr Rachael Stanley PhD <sup>52</sup>, Claire Stuart <sup>52</sup> and Dr Elizabeth Wastenge MD <sup>20</sup>.

### Sequencing and analysis:

Dr Erwan Acheson PhD<sup>6</sup>, Safiah Afifi BSc<sup>36</sup>, Dr Elias Allara MD PhD<sup>2,3</sup>, Dr Roberto Amato<sup>1</sup>, Dr Adrienn Angyal PhD<sup>38</sup>, Dr Elihu Aranday-Cortes PhD/DVM<sup>21</sup>, Cristina Ariani<sup>1</sup>, Jordan Ashworth<sup>19</sup>, Dr Stephen Attwood<sup>24</sup>, Alp Aydin MSc<sup>51</sup>, David J Baker BEng<sup>51</sup>, Dr Carlos E Balcazar PhD<sup>19</sup>, Angela Beckett MSc<sup>68</sup> Robert Beer BSc<sup>36</sup>, Dr Gilberto Betancor PhD<sup>76</sup>, Emma Betteridge<sup>1</sup>, Dr David Bibby<sup>7</sup>, Dr Daniel Bradshaw<sup>7</sup>, Catherine Bresner BSc(Hons)<sup>34</sup>, Dr Hannah E Bridgewater PhD<sup>71</sup>, Alice Broos BSc (Hons)<sup>21</sup>, Dr Rebecca Brown PhD<sup>38</sup>, Dr Paul E Brown PhD<sup>71</sup>, Dr Kirstyn Bruncker PhD<sup>22</sup>, Dr Stephen N Carmichael PhD<sup>21</sup>, Jeffrey K. J. Cheng MSc<sup>71</sup>, Dr Rachel Colquhoun DPhil<sup>19</sup>, Dr Gavin Dabrera<sup>7</sup>, Dr Johnny Debebe PhD<sup>54</sup>, Eleanor Drury<sup>1</sup>, Dr Louis du Plessis<sup>24</sup>, Richard Eccles MSc<sup>46</sup>, Dr Nicholas Ellaby<sup>7</sup>, Audrey Farbos MSc<sup>49</sup>, Ben Farr<sup>1</sup>, Dr Jacqueline Findlay PhD<sup>41</sup>, Chloe L Fisher MSc<sup>74</sup>, Leysa Marie Forrest MSc<sup>41</sup>, Dr Sarah Francois<sup>24</sup>, Lucy R. Frost BSc<sup>71</sup>, William Fuller BSc<sup>34</sup>, Dr Eileen Gallagher<sup>7</sup>, Dr Michael D Gallagher PhD<sup>19</sup>, Matthew Gemmell MSc<sup>46</sup>, Dr Rachel AJ Gilroy PhD<sup>51</sup>, Scott Goodwin<sup>1</sup>, Dr Luke R Green PhD<sup>38</sup>, Dr Richard Gregory PhD<sup>46</sup>, Dr Natalie Groves<sup>7</sup>, Dr James W Harrison PhD<sup>49</sup>, Hassan Hartman<sup>7</sup>, Dr Andrew R Hesketh PhD<sup>93</sup>, Verity Hill<sup>19</sup>, Dr Jonathan Hubb<sup>7</sup>, Dr Margaret Hughes PhD<sup>46</sup>, Dr David K Jackson<sup>1</sup>, Dr Ben Jackson PhD<sup>19</sup>, Dr Keith James<sup>1</sup>, Natasha Johnson BSc (Hons)<sup>21</sup>, Ian Johnston<sup>1</sup>, Jon-Paul Keatley<sup>1</sup>, Dr Moritz Kraemer<sup>24</sup>, Dr Angie Lackenby<sup>7</sup>, Dr Mara Lawniczak<sup>1</sup>, Dr David Lee<sup>7</sup>, Rich Livett<sup>1</sup>, Stephanie Lo<sup>1</sup>, Daniel Mair BSc (Hons)<sup>21</sup>, Joshua Maksimovic FD sport science<sup>36</sup>, Nikos Manesis<sup>7</sup>, Dr Robin Manley Ph.D<sup>49</sup>, Dr Carmen Manso<sup>7</sup>, Dr Angela Marchbank BSc<sup>34</sup>, Dr Inigo Martincorena<sup>1</sup>, Dr Tamyo Mbisa<sup>7</sup>, Kathryn McCluggage MSc<sup>36</sup>, Dr JT McCrone PhD<sup>19</sup>, Shahjahan Miah<sup>7</sup>, Michelle L Michelsen BSc<sup>49</sup>, Dr Mari Morgan PhD<sup>33</sup>, Dr Gaia Nebbia PhD, FRCPath<sup>78</sup>, Charlotte Nelson MSc<sup>46</sup>, Jenna Nichols BSc (Hons)<sup>21</sup>, Dr Paola Niola PhD<sup>41</sup>, Dr Kyriaki Nomikou PhD<sup>21</sup>, Steve Palmer<sup>1</sup>, Dr. Naomi Park<sup>1</sup>, Dr Yasmin A Parr PhD<sup>21</sup>, Dr Paul J Parsons PhD<sup>38</sup>, Vineet Patel<sup>7</sup>, Dr. Minal Patel<sup>1</sup>, Clare Pearson MSc<sup>2,1</sup>, Dr Steven Platt<sup>7</sup>, Christoph Puethe<sup>1</sup>, Dr. Mike Quail<sup>1</sup>, Dr Jayna Raghwanani<sup>24</sup>, Dr Lucille Rainbow PhD<sup>46</sup>, Shavanthi Rajatileka<sup>1</sup>, Dr Mary Ramsay<sup>7</sup>, Dr Paola C Resende Silva PhD<sup>41,42</sup>, Steven Rudder<sup>51</sup>, Dr Chris Ruis<sup>3</sup>, Dr Christine M Sambles PhD<sup>49</sup>, Dr Fei Sang PhD<sup>54</sup>, Dr Ulf Schaefer<sup>7</sup>, Dr Emily Scher PhD<sup>19</sup>, Dr. Carol Scott<sup>1</sup>, Lesley Shirley<sup>1</sup>, Adrian W Signell BSc<sup>76</sup>, John Sillitoe<sup>1</sup>, Christen Smith<sup>1</sup>, Dr Katherine L Smollett PhD<sup>21</sup>, Karla Spellman FD<sup>36</sup>, Thomas D Stanton BSc<sup>19</sup>, Dr David J Studholme PhD<sup>49</sup>, Ms Grace Taylor-Joyce BSc<sup>71</sup>, Dr Ana P Tedim PhD<sup>51</sup>, Dr Thomas Thompson PhD<sup>6</sup>, Dr Nicholas M Thomson PhD<sup>51</sup>, Scott Thurston<sup>1</sup>, Lily Tong PhD<sup>21</sup>, Gerry Tonkin-Hill<sup>1</sup>, Rachel M Tucker MSc<sup>38</sup>, Dr Edith E Vamos PhD<sup>4</sup>, Dr Tetyana Vasylieva<sup>24</sup>, Joanna Warwick-Dugdale BSc<sup>49</sup>, Danni Weldon<sup>1</sup>, Dr Mark Whitehead PhD<sup>46</sup>, Dr David Williams<sup>7</sup>, Dr Kathleen A Williamson PhD<sup>19</sup>, Harry D Wilson BSc<sup>76</sup>, Trudy Workman HNC<sup>34</sup>, Dr Muhammad Yasir PhD<sup>51</sup>, Dr Xiaoyu Yu PhD<sup>19</sup>, and Dr Alex Zarebski<sup>24</sup>.

### Samples and logistics:

Dr Evelien M Adriaenssens PhD<sup>51</sup>, Dr Shazaad S Y Ahmad MSc<sup>2,47</sup>, Adela Alcolea-Medina MPharm<sup>59,77</sup>, Dr John Allan PhD<sup>60</sup>, Dr Patawee Asamaphan PhD<sup>21</sup>, Laura Atkinson MSc<sup>40</sup>, Paul Baker MD<sup>63</sup>, Professor Jonathan Ball PhD<sup>55</sup>, Dr Edward Barton MD<sup>64</sup>, Dr. Mathew A Beale<sup>1</sup>, Dr. Charlotte Beaver<sup>1</sup>, Dr Andrew Beggs PhD<sup>16</sup>, Dr Andrew Bell PhD<sup>51</sup>, Duncan J Berger<sup>1</sup>, Dr Louise Berry<sup>56</sup>, Claire M Bewshea MSc<sup>49</sup>, Kelly Bicknell<sup>70</sup>, Paul Bird<sup>58</sup>, Dr Chloe Bishop<sup>7</sup>, Dr Tim Boswell<sup>56</sup>, Cassie Breen BSc<sup>48</sup>, Dr Sarah K Buddenborg<sup>1</sup>, Dr Shirelle Burton-Fanning MD<sup>66</sup>, Dr Vicki Chalker<sup>7</sup>, Dr Joseph G Chappell PhD<sup>55</sup>, Themoula Charalampous MSc<sup>78,94</sup>, Claire Cormie<sup>3</sup>, Dr Nick Cortes PhD<sup>29,25</sup>, Dr Lindsay J Coupland PhD<sup>52</sup>, Angela Cowell

MSc<sup>48</sup>, Dr Rose K Davidson PhD<sup>53</sup>, Joana Dias MSc<sup>3</sup>, Dr Maria Diaz PhD<sup>51</sup>, Thomas Dibling<sup>1</sup>, Matthew J Dorman<sup>1</sup>, Dr Nichola Duckworth<sup>57</sup>, Scott Elliott<sup>70</sup>, Sarah Essex<sup>63</sup>, Karlie Fallon<sup>58</sup>, Theresa Feltwell<sup>8</sup>, Dr Vicki M Fleming PhD<sup>56</sup>, Sally Forrest BSc<sup>3</sup>, Luke Foulser<sup>1</sup>, Maria V Garcia-Casado<sup>1</sup>, Dr Artemis Gavriil PhD<sup>41</sup>, Dr Ryan P George PhD<sup>47</sup>, Laura Gifford MSc<sup>33</sup>, Harmeet K Gill PhD<sup>3</sup>, Jane Greenaway MSc<sup>65</sup>, Luke Griffith BSc<sup>53</sup>, Ana Victoria Gutierrez<sup>51</sup>, Dr Antony D Hale MBBS<sup>85</sup>, Dr Tanzina Haque FRCPath, PhD<sup>91</sup>, Katherine L Harper MBiol<sup>85</sup>, Dr Ian Harrison<sup>7</sup>, Dr Judith Heaney PhD<sup>89</sup>, Thomas Helmer<sup>58</sup>, Ellen E Higginson PhD<sup>3</sup>, Richard Hopes<sup>2</sup>, Dr Hannah C Howson-Wells PhD<sup>56</sup>, Dr Adam D Hunter<sup>1</sup>, Robert Impey<sup>70</sup>, Dr Dianne Irish-Tavares FRCPath<sup>91</sup>, David A Jackson<sup>1</sup>, Kathryn A Jackson MSc<sup>46</sup>, Dr Amelia Joseph<sup>56</sup>, Leanne Kane<sup>1</sup>, Sally Kay<sup>1</sup>, Leanne M Kermack MSc<sup>3</sup>, Manjinder Khakh<sup>56</sup>, Dr Stephen P Kidd PhD<sup>29,25,31</sup>, Dr Anastasia Kolyva PhD<sup>51</sup>, Jack CD Lee BSc<sup>40</sup>, Laura Letchford<sup>1</sup>, Nick Levene MSc<sup>79</sup>, Dr LisaJ Levett PhD<sup>89</sup>, Dr Michelle M Lister PhD<sup>56</sup>, Allyson Lloyd<sup>70</sup>, Dr Joshua Loh PhD<sup>60</sup>, Dr Louissa R Macfarlane-Smith PhD<sup>85</sup>, Dr Nicholas W Machin MSc<sup>2,47</sup>, Mailis Maes M.phil<sup>3</sup>, Dr Samantha McGuigan<sup>1</sup>, Liz McMinn<sup>1</sup>, Dr Lamia Mestek-Boukhibar D.Phil<sup>41</sup>, Dr Zoltan Molnar PhD<sup>6</sup>, Lynn Monaghan<sup>79</sup>, Dr Catrin Moore<sup>27</sup>, Plamena Naydenova BSc<sup>3</sup>, Alexandra S Neaverson<sup>1</sup>, Dr. Rachel Nelson PhD<sup>1</sup>, Marc O Niebel MSc<sup>21</sup>, Elaine O'Toole BSc<sup>48</sup>, Debra Padgett BSc<sup>64</sup>, Gaurang Patel<sup>1</sup>, Dr Brendan Al Payne MD<sup>66</sup>, Liam Prestwood<sup>1</sup>, Dr Veena Raviprakash MD<sup>67</sup>, Nicola Reynolds PhD<sup>86</sup>, Dr Alex Richter PhD<sup>16</sup>, Dr Esther Robinson PhD<sup>95</sup>, Dr Hazel A Rogers<sup>1</sup>, Dr Aileen Rowan PhD<sup>96</sup>, Garren Scott BSc<sup>64</sup>, Dr Divya Shah PhD<sup>40</sup>, Nicola Sheriff BSc<sup>67</sup>, Dr Graciela Sluga MD - MSc<sup>92</sup>, Emily Souster<sup>1</sup>, Dr. Michael Spencer-Chapman<sup>1</sup>, Sushmita Sridhar BSc<sup>1,3</sup>, Tracey Swingler<sup>53</sup>, Dr Julian Tang<sup>58</sup>, Professor Graham P Taylor DSc<sup>96</sup>, Dr Theocharis Tsoleridis PhD<sup>55</sup>, Dr Lance Turtle PhD MRCP<sup>46</sup>, Dr Sarah Walsh<sup>57</sup>, Dr Michelle Wantoch PhD<sup>86</sup>, Joanne Watts BSc<sup>48</sup>, Dr Sheila Waugh MD<sup>66</sup>, Sam Weeks<sup>41</sup>, Dr Rebecca Williams BMBS<sup>31</sup>, Dr Iona Willingham<sup>56</sup>, Dr Emma L Wise PhD<sup>25,29,31</sup>, Victoria Wright BSc<sup>54</sup>, Dr Sarah Wyllie<sup>70</sup>, and Jamie Young BSc<sup>3</sup>.

### Software and analysis tools

Amy Gaskin MSc<sup>33</sup>, Dr Will Rowe PhD<sup>15</sup>, and Dr Igor Siveroni PhD<sup>96</sup>.

### Visualisation:

Dr Robert Johnson PhD<sup>96</sup>.

**1** Wellcome Sanger Institute, **2** Public Health England, **3** University of Cambridge, **4** Health Data Research UK, Cambridge, **5** Public Health Agency, Northern Ireland, **6** Queen's University Belfast **7** Public Health England Colindale, **8** Department of Medicine, University of Cambridge, **9** University of Oxford, **10** Departments of Infectious Diseases and Microbiology, Cambridge University Hospitals NHS Foundation Trust; Cambridge, UK, **11** Division of Virology, Department of Pathology, University of Cambridge, **12** The Francis Crick Institute, **13** Cambridge Institute for Therapeutic Immunology and Infectious Disease, Department of Medicine, **14** Public Health England, Clinical Microbiology and Public Health Laboratory, Cambridge, UK, **15** Institute of Microbiology and Infection, University of Birmingham, **16** University of Birmingham, **17** Queen Elizabeth Hospital, **18** Heartlands Hospital, **19** University of Edinburgh, **20** NHS Lothian, **21** MRC-University of Glasgow Centre for Virus Research, **22** Institute of Biodiversity, Animal Health & Comparative Medicine, University of Glasgow, **23** West of Scotland Specialist Virology Centre, **24** Dept Zoology, University of Oxford, **25** University of Surrey, **26** Wellcome Centre for Human Genetics, Nuffield Department of Medicine, University of Oxford, **27** Big Data Institute, Nuffield Department of Medicine, University of Oxford, **28** Oxford University Hospitals NHS Foundation Trust, **29** Basingstoke Hospital, **30** Centre for Genomic Pathogen Surveillance, University of Oxford, **31** Hampshire Hospitals NHS Foundation Trust, **32** University of Southampton, **33** Public Health Wales NHS Trust, **34** Cardiff University, **35** Betsi Cadwaladr University Health Board, **36** Cardiff and Vale University Health Board, **37** Swansea University, **38** University of Sheffield, **39** Sheffield Teaching Hospitals, **40** Great Ormond Street NHS Foundation Trust, **41** University College London, **42** Oswaldo Cruz Institute, Rio de Janeiro **43** North

West London Pathology, **44** Imperial College Healthcare NHS Trust, **45** NIHR Health Protection Research Unit in HCAI and AMR, Imperial College London, **46** University of Liverpool, **47** Manchester University NHS Foundation Trust, **48** Liverpool Clinical Laboratories, **49** University of Exeter, **50** Royal Devon and Exeter NHS Foundation Trust, **51** Quadram Institute Bioscience, University of East Anglia, **52** Norfolk and Norwich University Hospital, **53** University of East Anglia, **54** Deep Seq, School of Life Sciences, Queens Medical Centre, University of Nottingham, **55** Virology, School of Life Sciences, Queens Medical Centre, University of Nottingham, **56** Clinical Microbiology Department, Queens Medical Centre, **57** PathLinks, Northern Lincolnshire & Goole NHS Foundation Trust, **58** Clinical Microbiology, University Hospitals of Leicester NHS Trust, **59** Viapath, **60** Hub for Biotechnology in the Built Environment, Northumbria University, **61** NU-OMICS Northumbria University, **62** Northumbria University, **63** South Tees Hospitals NHS Foundation Trust, **64** North Cumbria Integrated Care NHS Foundation Trust, **65** North Tees and Hartlepool NHS Foundation Trust, **66** Newcastle Hospitals NHS Foundation Trust, **67** County Durham and Darlington NHS Foundation Trust, **68** Centre for Enzyme Innovation, University of Portsmouth, **69** School of Biological Sciences, University of Portsmouth, **70** Portsmouth Hospitals NHS Trust, **71** University of Warwick, **72** University Hospitals Coventry and Warwickshire, **73** Warwick Medical School and Institute of Precision Diagnostics, Pathology, UHCW NHS Trust, **74** Genomics Innovation Unit, Guy's and St. Thomas' NHS Foundation Trust, **75** Centre for Clinical Infection & Diagnostics Research, St. Thomas' Hospital and Kings College London, **76** Department of Infectious Diseases, King's College London, **77** Guy's and St. Thomas' Hospitals NHS Foundation Trust, **78** Centre for Clinical Infection and Diagnostics Research, Department of Infectious Diseases, Guy's and St Thomas' NHS Foundation Trust, **79** Princess Alexandra Hospital Microbiology Dept. , **80** Cambridge University Hospitals NHS Foundation Trust, **81** East Kent Hospitals University NHS Foundation Trust, **82** University of Kent, **83** Gloucestershire Hospitals NHS Foundation Trust, **84** Department of Microbiology, Kettering General Hospital, **85** National Infection Service, PHE and Leeds Teaching Hospitals Trust, **86** Cambridge Stem Cell Institute, University of Cambridge, **87** Public Health Scotland, **88** Belfast Health & Social Care Trust, **89** Health Services Laboratories, **90** Barking, Havering and Redbridge University Hospitals NHS Trust, **91** Royal Free NHS Trust, **92** Maidstone and Tunbridge Wells NHS Trust, **93** University of Brighton, **94** Kings College London, **95** PHE Heartlands, **96** Imperial College London, **97** Department of Infection Biology, London School of Hygiene and Tropical Medicine.
